# 1 Impacts of K-12 school reopening on the COVID-19 epidemic in 2 Indiana, USA

3 Guido España<sup>#</sup>, Sean Cavany<sup>\*</sup>, Rachel Oidtman<sup>\*</sup>, Carly Barbera,  
Alan Costello, Anita Lerch, Marya Poterek, Quan Tran, Annaliese Wieler  
Sean Moore, T. Alex Perkins<sup>#</sup>

Department of Biological Sciences and Eck Institute for Global Health,  
University of Notre Dame, United States

<sup>#</sup>Correspondence: [guido.espana@nd.edu](mailto:guido.espana@nd.edu), [taperkins@nd.edu](mailto:taperkins@nd.edu)

<sup>\*</sup>Equal contribution

## 4 Abstract

5 In the United States, schools closed in March 2020 due to COVID-19 and began reopening in  
6 August 2020, despite continuing transmission of SARS-CoV-2. In states where in-person in-  
7 struction resumed at that time, two major unknowns were the capacity at which schools would  
8 operate, which depended on the proportion of families opting for remote instruction, and adher-  
9 ence to face-mask requirements in schools, which depended on cooperation from students and  
10 enforcement by schools. To determine the impact of these conditions on the statewide burden of  
11 COVID-19 in Indiana, we used an agent-based model calibrated to and validated against mul-  
12 tiple data types. Using this model, we quantified the burden of COVID-19 on K-12 students,  
13 teachers, their families, and the general population under alternative scenarios spanning three  
14 levels of school operating capacity (50%, 75%, and 100%) and three levels of face-mask adher-  
15 ence in schools (50%, 75%, and 100%). Under a scenario in which schools operated remotely,  
16 we projected 45,579 (95% CrI: 14,109-132,546) infections and 790 (95% CrI: 176-1680) deaths  
17 statewide between August 24 and December 31. Reopening at 100% capacity with 50% face-  
18 mask adherence in schools resulted in a proportional increase of 42.9 (95% CrI: 41.3-44.3) and  
19 9.2 (95% CrI: 8.9-9.5) times that number of infections and deaths, respectively. In contrast,  
20 our results showed that at 50% capacity with 100% face-mask adherence, the number of infec-  
21 tions and deaths were 22% (95% CrI: 16%-28%) and 11% (95% CrI: 5%-18%) higher than the  
22 scenario in which schools operated remotely. Within this range of possibilities, we found that  
23 high levels of school operating capacity (80-95%) and intermediate levels of face-mask adherence  
24 (40-70%) resulted in model behavior most consistent with observed data. Together, these results  
25 underscore the importance of precautions taken in schools for the benefit of their communities.

## 26 Keywords

27 COVID-19, agent-based model, public health, school reopening, face masks

## 28 1 Introduction

29 The United States has been the country most severely impacted by the COVID-19 pandemic  
30 in terms of total reported cases and deaths, with over 28 million reported cases and more than  
31 500 thousand deaths by March, 2021 [1]. This severity led to social interventions on an unprece-  
32 dented scale, including restrictions on mass gatherings, bans on non-essential travel, and school  
33 closures [2, 3, 4, 5]. While such restrictions were initially successful in reducing transmission, the  
34 subsequent relaxation of restrictions on mass gatherings and movement were followed by large  
35 increases in notified cases and deaths [1, 3, 6, 7]. By the time the 2020-2021 school year began  
36 in August, transmission was at its highest point in the epidemic yet in some parts of the US. In  
37 Indiana, for example, the maximum number of daily cases was around 1,200 by then, which was  
38 higher than the previous maximum of fewer than 800 in late April [8].

39 This context of intense community transmission raised numerous questions about how schools  
40 should approach reopening for the start of the school year in August [9, 10, 11]. During influenza  
41 epidemics, school closures have been estimated to reduce transmission community-wide [12, 13,  
42 14]. In general, schools are seen as key drivers of the transmission of respiratory pathogens due to  
43 close contact among children at school [15, 16, 17]. However, several factors complicated the effect  
44 of school reopenings on SARS-CoV-2 transmission. In particular, children and adolescents appear  
45 less susceptible to infection and are much less likely to experience severe outcomes following  
46 infection [18, 19, 20, 21, 22, 23]. It is also still unclear what their contribution to transmission is,  
47 but several studies suggest they can play an important role [18, 24, 25, 26]. There are additional  
48 economic and social factors to consider, too, such as the economic costs of school closures for  
49 families that must then stay home from work, and the nutritional benefits of school reopening  
50 for children who rely on free and subsidized school meals [27, 28, 29].

51 Our objective in this study was to explore how different conditions for school reopening during  
52 the fall semester of 2020 could have impacted the statewide burden of COVID-19 in Indiana.  
53 Specifically, we focused on the effects of school operating capacity and adherence to wearing face  
54 masks in schools. This focus was motivated by the fact that Indiana and other US states reopened  
55 their schools for in-person instruction in August with only minimal interventions of requiring face  
56 masks and physical distancing in schools, despite uncertainty about the proportion of students  
57 who would elect to attend in person and the degree to which they would adhere to face-mask  
58 and physical-distancing requirements. We approached this question with an agent-based model  
59 originally developed for pandemic influenza [30], which we tailored to SARS-CoV-2 [19, 31, 32,  
60 33, 21, 34] and applied to a geographically and demographically realistic synthetic population  
61 representing Indiana. In addition to presenting outcomes across a range of hypothetical scenarios,  
62 we calibrated our model to data from the fall to assess the plausibility of K-12 school reopening  
63 as a driver of the observed resurgence of SARS-CoV-2 in Indiana during fall 2020.

## 64 2 Methods

### 65 2.1 Approach

66 Our approach to modeling SARS-CoV-2 transmission was based on the Framework for Recon-  
67 structing Epidemic Dynamics (FRED) [30], an agent-based model that offers the ability to explore  
68 the impacts of complex, non-pharmaceutical interventions in a natural way through modifications  
69 to individual behaviors. Using this model, we simulated the spread of SARS-CoV-2 in Indiana  
70 using a synthetic population with demographic and geographic characteristics of the state’s real  
71 population, including age, household composition, household location, and occupation [35]. We  
72 analyzed the impact of school reopening from August 24 (first day of classes in Marion County,  
73 the most populous) to December 31, 2020 in the population of Indiana as a whole, as well as in  
74 students, teachers, and their cohabitants. We quantified impact as the difference in the num-  
75 ber of COVID-19 infections, symptomatic infections, and deaths between each scenario and a  
76 baseline scenario, the details of which differed according to which comparisons were of interest.

### 77 2.2 Agent-based model

78 Our model was based on a synthetic population of the entire state of Indiana [35], which included  
79 1.3 million K-12 students, 1.7 million people living with students, and 6.3 million people in total  
80 (Table S10). Each of these agents visits a set of places defined by their activity space, which can  
81 include houses, schools, workplaces, long-term care facilities, and various neighborhood locations.  
82 Transmission can occur when an infected agent visits the same location as a susceptible agent on  
83 the same day, with numbers of contacts per agent specific to each location type. For example,  
84 school contacts depend not on the size of the school but on the age of the student and their  
85 assigned school grade, given that students have a higher number of contacts with students in  
86 their classroom than with those in other classrooms. Every day of the week, students and  
87 teachers visit their school, and students are assigned to classrooms based on their age. Given  
88 that schools are closed during the weekends, community contact is increased by 50% for students  
89 and teachers on weekends, unless they are sheltering in place [30]. Community contacts are  
90 modeled as contacts with other agents in the same neighborhood. For both schools and other  
91 locations, we adopted contact rates for each location type that were previously calibrated to  
92 influenza attack rates specific to each location type [30, 36].

93 Once infected, each agent had a latent period (mean = 3.35 days, standard deviation = 1.16  
94 d) and an infectious period (mean = 3.7 d, s.d. = 1.2 d) drawn from distributions calibrated  
95 so that the average generation interval distribution matched estimates from Singapore (mean =  
96 5.20 d, s.d. = 1.72 d) [33]. The absolute risk of transmission depended on the number and loca-  
97 tion of an infected agent’s contacts and a parameter that controls SARS-CoV-2 transmissibility  
98 upon contact, which we calibrated. A proportion of the infections were asymptomatic, with the  
99 probability of symptoms increasing with age [37, 19, 38] (Table S9, Fig. S4). We assumed that  
100 these infections were as infectious as symptomatic infections and had identical incubation and  
101 infectious period distributions [39, 40, 26, 41]. Furthermore, we assumed that children were less  
102 susceptible to infection than adults, which we modeled with a logistic function calibrated to

103 model-based estimates of this relationship by Davies et al. [19]. We assumed that severity of  
104 disease increased with age, consistent with statistical analyses described elsewhere [32, 31, 38,  
105 21].

106 Agent behavior in FRED has the potential to change over the course of an epidemic. Following  
107 the onset of symptoms, infected agents self-isolate at home according to a fixed daily probability,  
108 whereas others continue their daily activities [42, 43]. This probability was chosen so that, on  
109 average, 68% of agents will self-isolate at some point during their symptoms. This figure of 68%  
110 was based on the proportion of symptomatic infections among healthcare workers in the USA  
111 that developed fever during the course of their infection [43], and assuming that those with fever  
112 are likely to self-isolate. Agents can also engage in a variety of non-pharmaceutical interventions,  
113 including school closure, sheltering in place, and a combination of mask-wearing and physical  
114 distancing. School closures occur on specific dates across the state [44], resulting in students  
115 limiting their activity space to household and neighborhood locations on those days. Within  
116 households, agents interacted with their cohabitants on a daily basis. We assumed that agents  
117 did not wear face masks inside their homes, nor did they isolate from their household members  
118 if infected. To capture temporal changes in overall mobility and community contact over the  
119 course of the epidemic, we modeled a time-varying probability of sheltering in place. On days  
120 when an agent sheltered in place, they reduced their activity spaces to their home only, whereas  
121 other agents continued with their normal routines.

122 We modeled protection from face masks by reducing the probability of transmission when  
123 an infected agent wore a face mask. Our default assumption followed a median estimate of an  
124 adjusted odds ratio of 0.3 against SARS-CoV in non-healthcare settings [45, 34]. A meta-analysis  
125 by Chu et al. [34] included studies in healthcare settings in addition to those from non-healthcare  
126 settings, but we included only estimates that referred to the latter. The proportion of agents  
127 wearing face masks in workplace and community settings changed over time, and we assumed  
128 that agents did not wear face masks inside their households. In addition, students and teachers  
129 wore face masks according to probabilities specified as part of school reopening scenarios in our  
130 analysis. Further details about the model are available in the Supplementary Text.

### 131 **2.3 Model calibration and validation**

132 Two of the time-varying drivers of transmission in our model were informed by time-varying data  
133 inputs. First, we informed the daily probability of sheltering in place with mobility reports from  
134 Google [46]. In doing so, this sheltering-in-place probability in our model accounts for both the  
135 effects of shelter-in-place orders and some people deciding to continue staying at home after those  
136 orders are lifted [47]. Second, we informed the daily proportion of agents wearing face masks in  
137 workplace and community settings with Google Trends data for Indiana using the terms “face  
138 mask” and “social distancing” [48]. To inform the magnitude of the proportion of people wearing  
139 face masks in workplace and community settings, we used survey data [49] on face-mask usage  
140 from a single point in time.

141 The values of nine model parameters (listed in Table S9) were informed by calibrating the  
142 model to three time-varying epidemiological data streams corresponding to the state of Indiana—  
143 daily deaths, daily hospitalizations, and daily test positivity at the state level through August

144 10—and to the age distribution of cumulative deaths through July 13. We obtained daily in-  
145 cidence of reported cases and deaths from the New York Times COVID-19 database [1]. Daily  
146 hospitalizations and the age distribution of cumulative deaths were obtained from the Indiana  
147 COVID-19 dashboard [8]. Daily numbers of tests performed in the state were available from The  
148 Covid Project [50]. To calibrate the model to these data, we first used a Sobol design sampling  
149 algorithm [51, 52] to draw 6,000 combinations of the nine calibrated parameters. We then calcu-  
150 lated the likelihood of each parameter combination given the data, and resampled the parameter  
151 combinations proportional to their likelihoods to obtain an approximation of the posterior dis-  
152 tribution of parameter values. Additional details about the calibration procedure are described  
153 in the Supplementary Material.

154 To validate the model, we compared its predictions to data withheld from model calibration.  
155 Specifically, we compared the calibrated model’s predictions of the infection attack rate, both  
156 overall and by age, to results from two statewide serological surveys undertaken in late April  
157 and early June [53, 54]. We assessed the model’s success in this validation exercise by visual  
158 comparison of the model’s predictions with the data, with a focus on overlap between the 95%  
159 prediction intervals of the model and the 95% credible intervals associated with the empirically-  
160 derived estimates from the serological surveys.

## 161 **2.4 Model outputs**

162 The main outputs from our model were the numbers of infections, symptomatic cases, hospital-  
163 izations, and deaths at the state level. For different comparisons, these outputs were examined  
164 either on a daily basis, cumulatively between August 24 and December 31, or stratified by place  
165 of infection (school, home, other) or affiliation with schools (student, teacher, none). Another  
166 output that we examined was the daily reproduction number,  $R(t)$ , which was calculated in the  
167 model for each infected agent and averaged across the modeled population. We defined  $R(t)$  as  
168 the average number of secondary infections caused by any agent who was infected on day  $t$ —  
169 i.e., the case reproduction number a la Fraser [55]. Finally, to account for uncertainty in these  
170 outcomes due to uncertainty in the calibrated parameters, we sampled parameter sets from our  
171 approximation of the posterior distribution of parameter values.

## 172 **2.5 Model scenarios**

### 173 **2.5.1 Effects of conditions in schools**

174 To explore how alternative conditions for school reopening could have impacted the statewide  
175 burden of COVID-19 in Indiana, we performed simulations that spanned a range of assumptions  
176 about school operating capacity and adherence of students and teachers to face masks while in  
177 school. We chose to focus on these parameters given that they were two of the major unknowns as  
178 the state proceeded with its plans for in-person instruction beginning in August 2020. Given that  
179 students were offered the option of either in-person or remote instruction, we evaluated scenarios  
180 in which school operating capacity was either 50%, 75%, or 100%. Specifically, this parameter  
181 represents the daily probability that a student would go to school, such that all students could go

182 to school at some point during the simulation but the average number of students in attendance  
183 on a given day is determined by the school operating capacity parameter. For each of these  
184 scenarios about school operating capacity, we also considered scenarios in which the adherence  
185 of students and teachers to face masks was either 50%, 75%, or 100%. In addition, we considered  
186 a scenario in which schools reopened normally (100% capacity, 0% face-mask adherence) and a  
187 scenario in which schools operated remotely (0% capacity, face-mask adherence irrelevant since  
188 no one in school).

### 189 **2.5.2 Sensitivity analyses**

190 To explore the sensitivity of our results to model uncertainties, we performed three sets of sensi-  
191 tivity analysis. First, for each of the nine scenarios comprising our primary analysis, we analyzed  
192 the sensitivity of cumulative infections and the proportion of infections acquired in schools to  
193 each of the nine calibrated parameters by calculating partial rank correlation coefficients [56].  
194 Second, we considered the sensitivity of our results to values of two assumed parameters not  
195 included in the calibration: protection afforded by face masks and the probability of isolation  
196 given symptoms. This included a total of four scenarios exploring lower and higher values of  
197 each of those parameters. Third, we considered alternative scenarios about select model assump-  
198 tions that we regarded as potentially important unknowns about transmission of SARS-CoV-2  
199 by children. These included scenarios in which asymptomatic infections (which are more likely  
200 to occur among children) are half as infectious as symptomatic infections, a scenario in which  
201 children aged 0-10 years have lower susceptibility (0.1), and a scenario in which individuals of all  
202 ages are equally susceptible to SARS-CoV-2 infection. For each of the alternative scenarios in  
203 the second and third sets of sensitivity analyses, we re-calibrated the model under that scenario  
204 and simulated it forward for the fall semester under the nine primary scenarios about school  
205 operating capacity and adherence to face-masks in schools. These latter two sets of sensitivity  
206 analyses all focused on cumulative infections statewide between August 24 and December 31,  
207 2020.

### 208 **2.5.3 Retrospective analysis**

209 To understand what conditions for school reopening resulted in model behavior consistent with  
210 data from fall 2020, we calibrated parameters for school operating capacity and face-mask adher-  
211 ence in schools to data from this time period. To do so, we held all other calibrated parameters  
212 at the values we estimated based on calibration to data from January 1 to August 24, 2020.  
213 Whereas we used Google mobility reports to drive a time-varying probability of sheltering in  
214 place during that initial period, we opted to assume fixed levels of mobility from August 24  
215 through December 31. The main reason for this choice was that the Google data we used for  
216 the initial period showed a decrease in mobility during the fall, despite an increase in incidence,  
217 making it difficult to explain the epidemiological data under that assumption. To overcome that  
218 problem and to make this analysis more directly comparable to our other analyses, we held the  
219 probability of sheltering in place fixed at either of two levels of mobility during the fall: 1) mo-  
220 bility remained at summer levels, or 2) mobility increased to pre-pandemic levels. Under these



221 assumptions, we calibrated the two focal parameters about conditions in schools to data from  
222 the fall using the same calibration procedure as we used during the initial period.

## 223 3 Results

### 224 3.1 Model calibration and validation

225 Our model was generally consistent with the data to which it was calibrated, capturing trends over  
226 time in daily deaths, hospitalizations, and test positivity at the state level (Fig. 1A-C), as well as  
227 greater proportions of deaths among older age groups (Fig. 1D). Some trade-offs in the model's  
228 ability to recreate different data types were apparent, such as a recent increase in hospitalizations  
229 that the model failed to capture (Fig. 1C), likely due to the predominance of data on deaths in the  
230 likelihood. Similarly, the model underestimated the proportion of deaths in people older than 80  
231 (Fig. 1B), indicating a possible underestimation of the contacts in this age group in the overall  
232 community or in long-term care facilities. Even so, the model's predictions reproduced the range  
233 of variability in the data, as assessed by the coverage probabilities of its 95% posterior predictive  
234 intervals (daily deaths: 0.85; daily hospitalizations: 0.93; daily test positivity: 0.95; cumulative  
235 deaths by age: 1.0). The model was also consistent with data withheld from fitting. Across  
236 all ages, the model's 95% posterior predictive intervals of the cumulative proportion infected  
237 through late April (median: 0.017; 95% CrI: 0.0045-0.051) and early June (median: 0.022; 95%  
238 CrI: 0.0058-0.069) spanned estimates from two state-wide serological surveys [53] (Fig. 2A). Our  
239 model's predictions also overlapped with age-stratified estimates from those surveys (Fig. 2B),  
240 although it underpredicted infections among individuals aged 40-60 years.

241 Calibration of the parameter that scaled the magnitude of SARS-CoV-2 importations [57, 58]  
242 in our model resulted in a median of 1.30 (95% PPI: 0.50-1.46) imported infections per day from  
243 February 1 to August 10. To ensure that the model reliably reproduced the high occurrence of  
244 deaths observed in long-term care facilities, we seeded infections into those facilities at a daily  
245 rate proportional to the prevalence of infection on that day; this calibrated proportion was 0.037  
246 (95% PPI: 0.022-0.092). On the opposite end of the age spectrum, our calibration resulted in  
247 a median estimate of susceptibility among children of 0.346 (95% CrI: 0.311-0.506), compared  
248 to 0.834 (95% CrI: 0.652-0.946) in adults (Fig. S1). Our calibration resulted in an estimate of  
249 transmissibility (median: 0.593; 95% CrI: 0.501-0.788) that corresponded to values of  $R(t)$  during  
250 the initial phase of the epidemic in Indiana of 1.73 (95% CrI: 1.11-2.34), which represents an  
251 average of daily values across the first two weeks of March (Fig. 1A). This estimate is within the  
252 range of other estimates for  $R(t)$  that include the state of Indiana [59, 60]. Driven by a calibrated  
253 estimate that the proportion of people sheltering in place rose in early March and peaked at a  
254 median of 32.1% (95% CrI: 28.8-66.9%) on April 7 (Fig. S2A), our estimates of  $R(t)$  dropped to  
255 a low of 0.57 (95% CrI: 0.42-0.71) on April 7 and remained below 1 thereafter (Fig. 1A). Also  
256 impacting our estimates of  $R(t)$  was the increasing use of face masks in the community, which  
257 we estimated at 53.4% (95% CrI: 46.1-54.0%) as of July 19 (Fig. S2B). Note that this estimated  
258 distribution of community face-mask adherence does not differ between scenarios and is not the  
259 same as the level of adherence in schools, which we imposed at different levels depending on the

260 scenario.

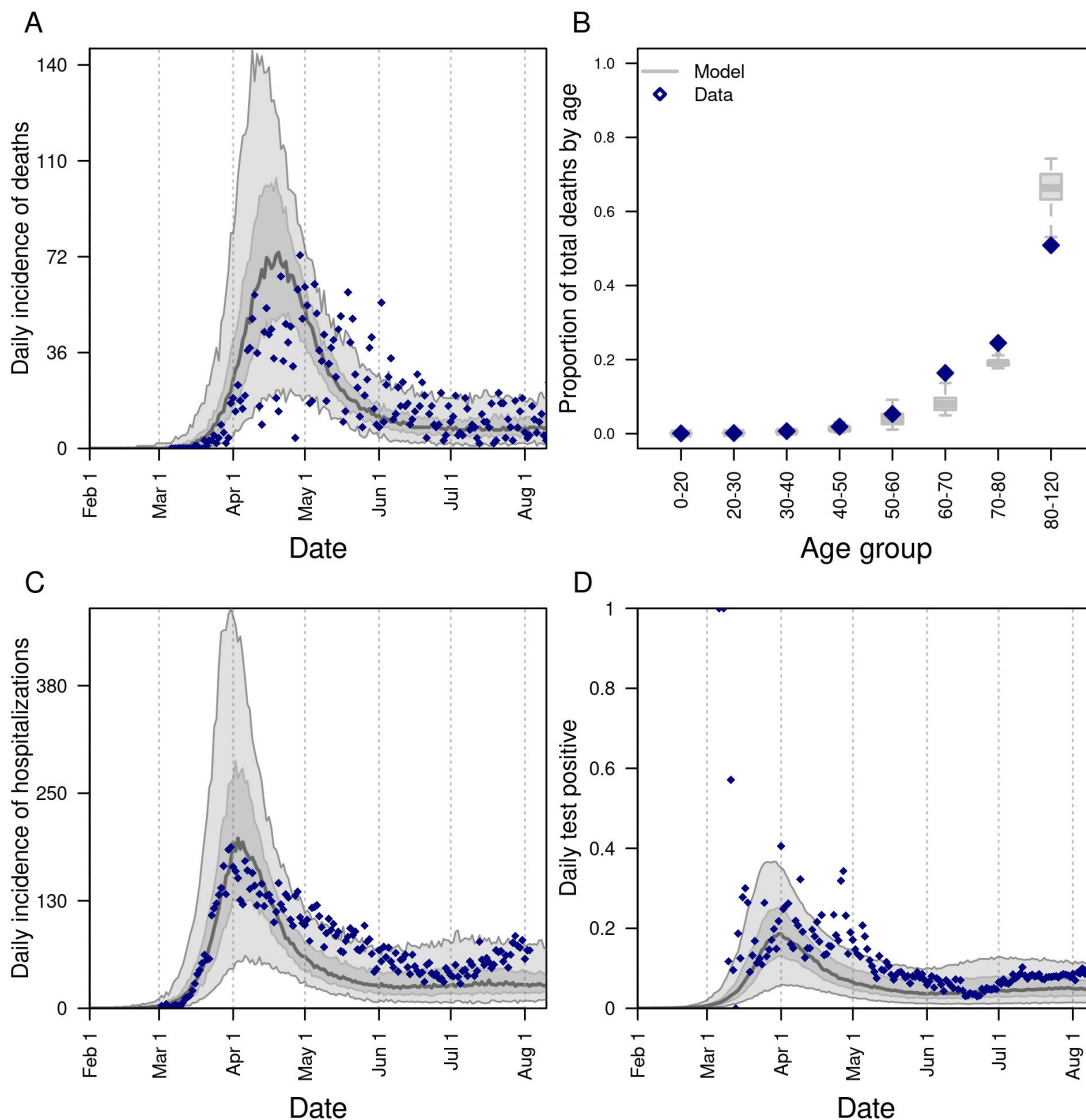

Figure 1. Model calibration to statewide data: A) daily incidence of death; B) proportion of deaths through July 13 in decadal age bins; C) daily incidence of hospitalization; and D) daily proportion of tests administered that are positive for SARS-CoV-2. In all panels, blue diamonds represent data. In A, C, and D, the gray line is the median, the dark shaded region the 50% posterior predictive interval, and the light shaded region the 95% posterior predictive interval.



## 261 3.2 Effects of conditions in schools

### 262 3.2.1 Effects on statewide burden

263 Under a scenario in which schools reopened at full capacity and without any use of face masks,  
264 our model projected that  $R(t)$  across the state as a whole would have increased to 1.72 (95%  
265 CrI: 1.43-2.17) by mid-September (Fig. 3A). Given our assumption that levels of sheltering in  
266 place and face-mask adherence in the community remained constant during the fall (Fig. S2B),  
267 this increase in transmission was driven by infections arising in schools (Fig. 3B). As a result,  
268 new infections statewide would have risen to levels in the fall far exceeding those from the spring  
269 (Fig. 3C). Under this scenario, our model projected a total of 2.57 million (95% CrI: 2.36-2.88  
270 million) infections (Fig. 4A) and 10,246 (95% CrI: 7,862-13,794) deaths (Fig. 4B) from Indiana's  
271 population as a whole between August 24 and December 31.

272 Under a scenario in which schools went to remote instruction and all children remained at  
273 home, our model projected that  $R(t)$  would have remained near levels from August for the  
274 remainder of 2020 (Fig. S3A). This was a result of our assumption that sheltering in place  
275 and face-mask adherence in the community would have remained at their estimated levels as  
276 of August 13. Under this scenario, transmission would have continued through contacts at  
277 workplaces, within homes, and elsewhere in the community (Fig. S3B), resulting in a total of

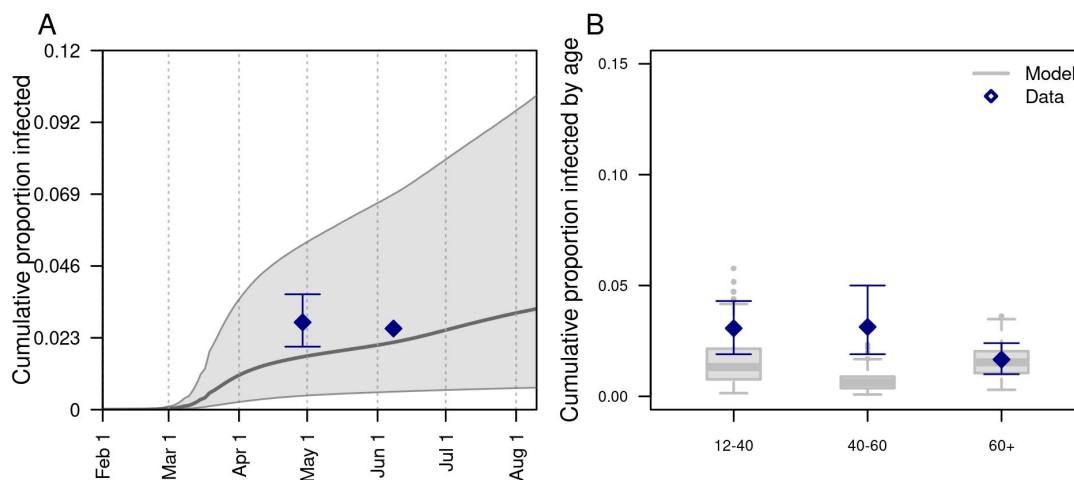

Figure 2. Model comparison with data withheld from fitting. We validated the model's predictions against statewide data withheld from fitting on A) the cumulative proportion of the population of Indiana infected through late April and early June, and B) the cumulative proportion infected among individuals aged 12-40, 40-60, and 60+. Data are shown in navy and come from a random, statewide serological survey [53]. Model predictions are shown in gray. In A, the line and band indicate the median and 95% posterior predictive interval. In B, lines, boxes, and error bars indicate median, interquartile range, and 95% posterior predictive interval.

278 45,579 (95% CrI: 14,651-132,546) infections (Fig. S3C) and 790 (95% CrI: 176-1,680) deaths  
279 from Indiana's population as a whole between August 24 and December 31.

280 Less extreme scenarios about school operating capacity and face-mask adherence in schools  
281 also resulted in a wide range of variation in the projected statewide burden of COVID-19 during  
282 fall 2020. Under a scenario in which schools operated at 50% capacity and achieved 100% face-  
283 mask adherence, the cumulative numbers of infections and deaths that our model projected were  
284 similar to projections under a scenario in which schools operated remotely (Fig. 4, Tables S1  
285 & S5). In general, cumulative infections and deaths statewide in fall 2020 were more sensitive  
286 to school operating capacity than to face-mask adherence in schools, with the worst outcomes  
287 projected to occur under a scenario with 100% school operating capacity and 50% face-mask  
288 adherence. Under this scenario, cumulative infections statewide were projected to have been  
289 42.8 (95% CrI: 41.3-44.3) times greater than if schools had operated remotely, and cumulative  
290 deaths statewide were projected to have been 9.2 (95% CrI: 8.9-9.5) times greater (Table S1).

### 291 **3.2.2 Effects on risk for individuals affiliated with schools**

292 Relative to a scenario with remote instruction, risk of infection and symptomatic infection was  
293 greatest for students (Figs. 5 & S5, left column), with a hundred-fold or greater increase in the  
294 risk of infection under a scenario with 100% school operating capacity and 50-75% face-mask  
295 adherence in schools (Tables S2 & S6). The risk of symptomatic disease in school-aged children  
296 was two-fold lower for children under 10 years of age (Fig. S6). Compared to students, the risk  
297 of infection was slightly lower for teachers, and much lower for students' families. Due to their  
298 older ages, however, teachers and families experienced a much higher risk of death than students  
299 (Figs. 5 & S5, center & right columns). The highest risk of death was for teachers under scenarios  
300 with 100% school operating capacity (Figs. 5 & S5, center column). Compared to a scenario  
301 with remote instruction, the relative risk of death for teachers under these scenarios ranged from  
302 a 41-fold increase when face-mask adherence was 100% to a 166-fold increase when face-mask  
303 adherence was 50% (Table S3, S7). Under scenarios with 75% school operating capacity, those  
304 same relative risks dropped to a four-fold increase when face-mask adherence was 100% and a  
305 22-fold increase when face-mask adherence was 50%. This again illustrates the overall greater  
306 effect of school operating capacity than face-mask adherence in schools.

### 307 **3.3 Sensitivity analyses**

308 Our sensitivity analysis of the model's nine calibrated parameters quantified the partial rank  
309 correlation coefficient (PRCC) of each of two model outputs: cumulative infections statewide  
310 from August 24 to December 31, and the proportion of infections acquired in schools. In general,  
311 these outputs were most sensitive to parameters controlling the age-susceptibility relationship  
312 (Figs. S7 & S8). Under some scenarios, the minimum susceptibility parameter, which applied to  
313 young children, had a PRCC as high as 0.6. The transmissibility parameter also had a PRCC  
314 that high, but only in some scenarios. For example, in scenarios with lower school operating  
315 capacity, the two parameters most relevant to community transmission—transmissibility and  
316 face-mask adherence in community settings—had a greater influence on cumulative infections

317 statewide (Fig. S7), given that the contribution of schools to transmission was diminished in  
318 those scenarios.

319 Our sensitivity analysis of parameters for protection afforded by face masks and the proba-  
320 bility of isolation given symptoms focused on cumulative infections statewide in fall 2020. For  
321 each alternative value of these parameters, we re-calibrated the model and generated projec-  
322 tions under our nine primary scenarios about school operating capacity and face-mask adherence  
323 in schools. In general, the relative effects of differences in face-mask adherence in schools and  
324 school operating capacity were similar under alternative values of protection afforded by face  
325 masks (Table S11). However, relative to a baseline with schools operating remotely, the magni-  
326 tude of the proportional increase in cumulative infections was sensitive to the level of protection  
327 afforded by face masks. For example, under a scenario with 75% face-mask adherence and 75%  
328 school operating capacity, the increase in cumulative infections ranged from 23.5-fold to 1.6-fold  
329 across the range of values of protection afforded by face masks that we explored (adjusted odds  
330 ratio = 0.12-0.73). Proportional increases in cumulative infections were generally insensitive to  
331 the probability of isolation given symptoms (Table S12). For example, under a scenario with  
332 75% face-mask adherence and 75% school operating capacity, the increase in cumulative infec-  
333 tions ranged from 4.9-fold to 6.9-fold across the range of values of isolation probability that we  
334 explored (0.5-0.9).

335 Our sensitivity analysis of assumptions related to the role of children in transmission also  
336 focused on cumulative infections statewide in fall 2020. Relative to a baseline with schools  
337 operating remotely, the proportional increase in cumulative infections was very similar to our  
338 default assumptions under a scenario with lower susceptibility among children aged 0-10 years and  
339 a scenario with lower infectiousness of asymptomatic infections (Table S13). This was the case  
340 for all scenarios about face-mask adherence in schools and school operating capacity, except for  
341 the most extreme case in which face-mask adherence in schools was 50% and school operating  
342 capacity was 100%. In that case, our default assumptions resulted in a 42.9-fold increase in  
343 cumulative infections, whereas the two alternative scenarios resulted in a 26-fold increase. Under  
344 a scenario with equal susceptibility for all ages, proportional increases in cumulative infections  
345 were much higher than under our default assumptions (Table S13). Because susceptibility in  
346 children was higher under this scenario, transmission statewide was much higher when school  
347 reopened, especially in scenarios with higher school operating capacity (Fig. S9). By the same  
348 token, prevalence dropped to levels over the summer when school was not in session that were  
349 much lower than the data suggest (Fig. S10), which raises doubts about the plausibility of this  
350 scenario.

### 351 **3.4 Retrospective analysis**

352 The model successfully reproduced statewide data from fall 2020 under relatively high values of  
353 school operating capacity and intermediate values of face-mask adherence in schools (Fig. 6).  
354 Under an assumption that the probability of sheltering in place in the state as a whole was fixed  
355 at levels from summer 2020 (Fig. 6, gray), the model calibration resulted in a median school  
356 operating capacity of 0.88 (95% CrI: 0.8-0.95) and a median face-mask adherence in schools of  
357 0.6 (95% CrI: 0.4-0.7). Under an assumption that the probability of sheltering in place was fixed

358 at pre-pandemic levels (Fig. 6, red), the model calibration resulted in a median school operating  
359 capacity of 0.85 (95% CrI: 0.77-0.92) and a median face-mask adherence in schools of 0.61 (95%  
360 CrI: 0.41-0.75). Overall, there was a wide range of values of face-mask adherence in schools that  
361 were consistent with the data, and the range of values of school operating capacity consistent  
362 with the data depended somewhat on face-mask adherence in schools (Fig. 6, bottom left).

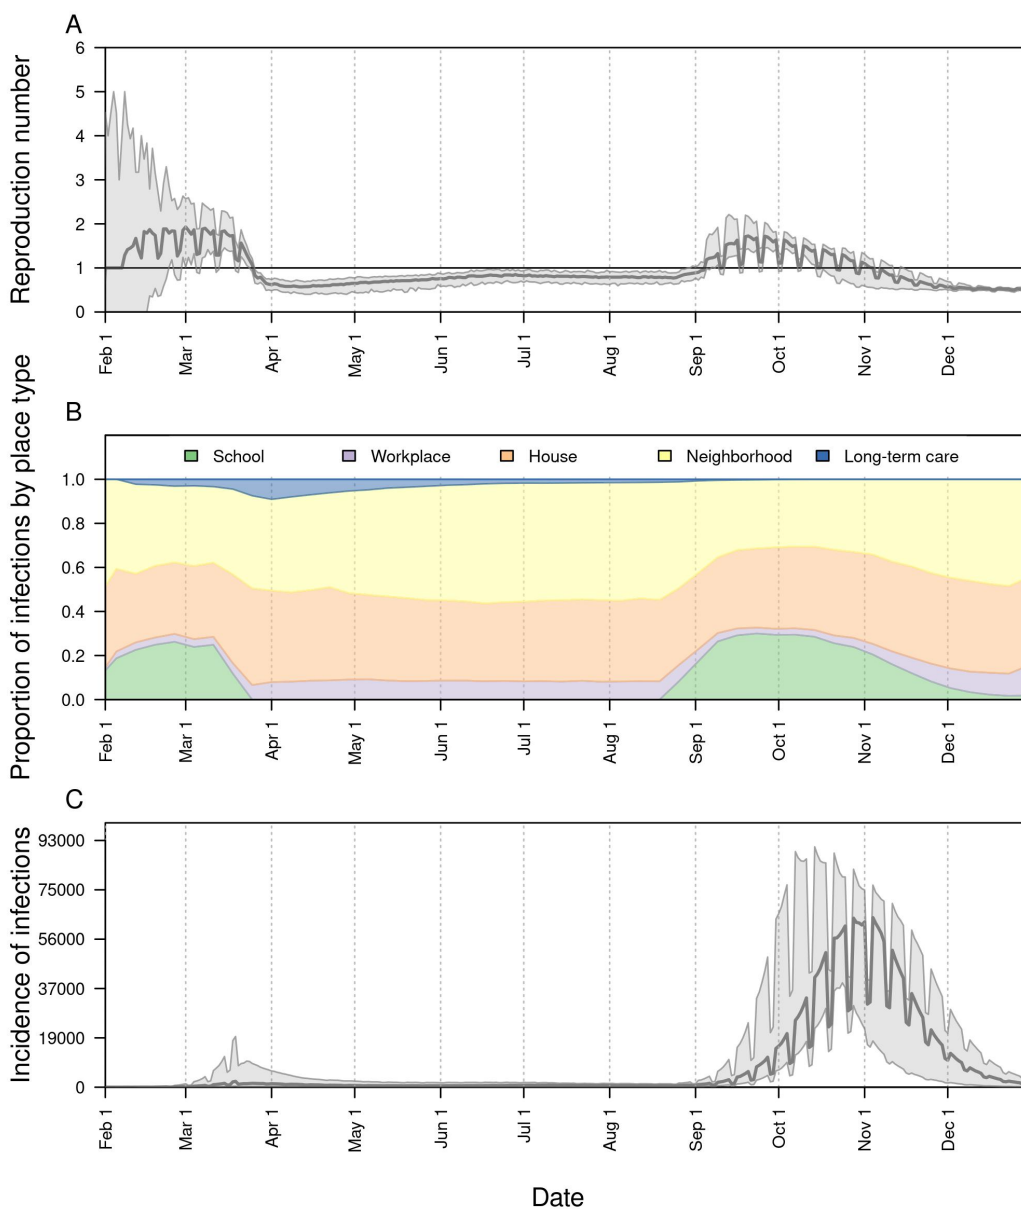

Figure 3. The impact of school reopening on August 24 under a scenario with 100% school operating capacity and 0% face-mask adherence in schools. Model outputs shown include: A) the reproduction number,  $R(t)$ , over time; B) the proportion of infections acquired in different location types (colors) over time; and C) the daily incidence of infection statewide over time. In A and C, the line represents the median, and the shaded region represents the 50% posterior predictive interval.

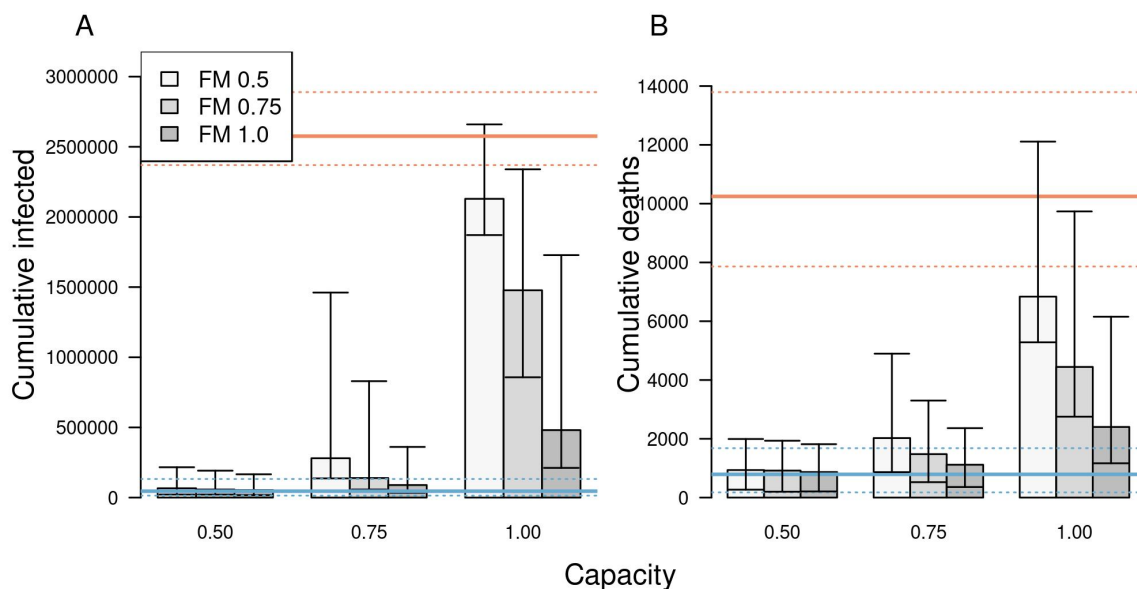

Figure 4. The impact of different scenarios about conditions for school reopening on A) cumulative infections and B) cumulative deaths in Indiana between August 24 and December 31. Scenarios are defined by school operating capacity (x-axis) and face-mask adherence in schools (shading). Orange lines represent projections under a scenario of school reopening at full capacity without masks (solid: median; dotted: 95% posterior predictive interval). Blue lines represent a scenario where schools operate remotely. Error bars indicate inter-quartile ranges.



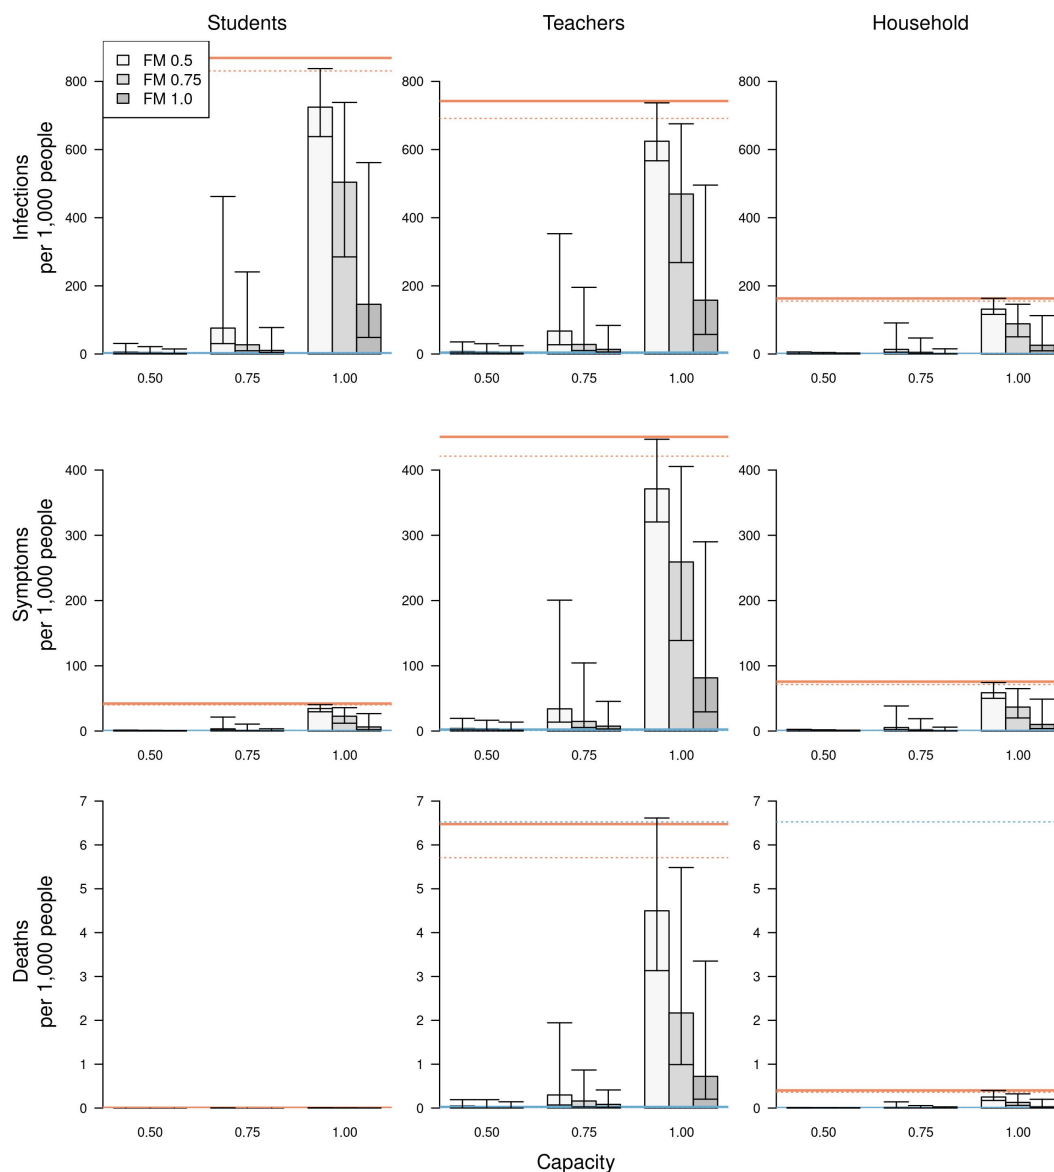

Figure 5. The impact of different scenarios about conditions for school reopening on infections (top row), symptomatic infections (middle row), and deaths (bottom row) per 1,000 people. These outcomes are presented separately for students (left column), teachers (middle column), and school-affiliated families (right column). Scenarios are defined by school operating capacity (x-axis) and face-mask adherence in schools (shading). Orange lines represent projections under a scenario of school reopening at full capacity without masks (solid: median; dotted: 95% posterior predictive interval). Blue lines represent a scenario where schools operate remotely. Error bars indicate inter-quartile ranges.

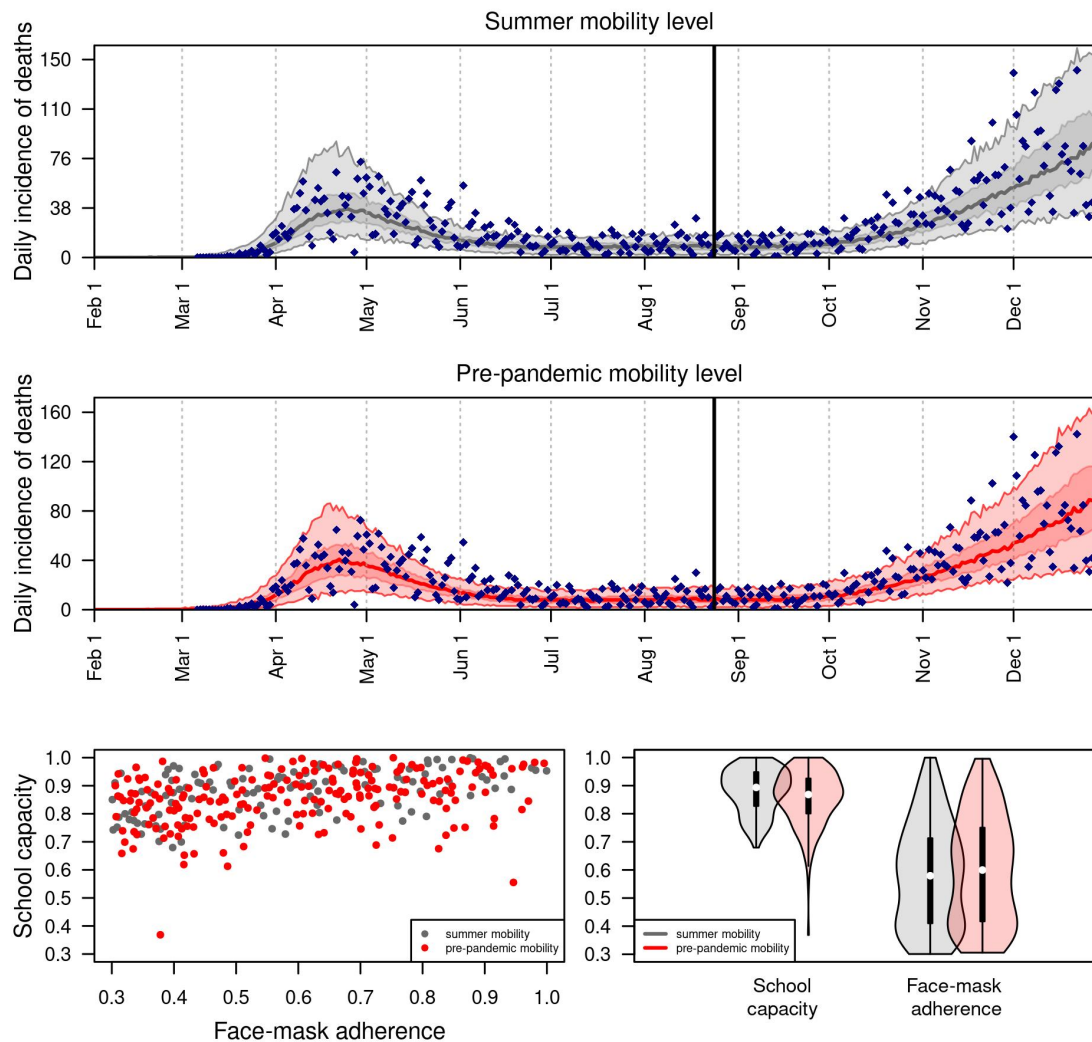

Figure 6. Retrospective analysis of the model calibrated to statewide data from fall 2020. Under two alternative scenarios about the daily probability of sheltering in place (summer vs. pre-pandemic mobility level in gray and red, respectively), we calibrated the parameters for school operating capacity and face-mask adherence in schools to data from August 24 through December 31, 2020 (blue diamonds). The calibrated model's correspondence to daily incidence of death statewide is shown in the top two panels, and values of the calibrated parameters are shown in the bottom panels.

## 363 4 Discussion

364 Our model provides a detailed, demographically realistic representation of SARS-CoV-2 trans-  
365 mission in Indiana that is consistent both with data to which it was calibrated and to data that  
366 was withheld from calibration. In contrast to models that rely on assumptions about intervention  
367 impacts or estimate them statistically [2, 61], our model makes predictions about intervention  
368 impacts based on first-principles assumptions about individual-level behavior and contact pat-  
369 terns. Consistent with results from other analyses [2, 61, 20], the inputs and assumptions in  
370 our model led to a prediction that schools made a considerable contribution to SARS-CoV-2  
371 transmission in February and early March, prior to large-scale changes in behavior. Extending  
372 that, a primary result of our analysis is that K-12 school reopening was capable of making a  
373 considerable contribution to SARS-CoV-2 transmission during fall of 2020, with the degree of  
374 that contribution dependent on conditions in schools.

375 The burden of COVID-19 associated with in-person school operation was predicted by our  
376 model to fall unevenly across the state's population. In scenarios of school operating capacity of  
377 100% with 50% face-mask adherence in schools, our model predicted that hundreds of thousands  
378 of children could have been infected during the fall semester, with very few of those resulting in  
379 deaths. In contrast, our results show that hundreds of deaths in teachers and school-affiliated  
380 families could have occurred. Our model indicates that the burden of COVID-19 in schools,  
381 teachers, and school-affiliated families across the state could have been reduced by operating  
382 at reduced capacity and achieving high face-mask adherence in schools. Under the relatively  
383 optimistic scenario of 50% school operating capacity and 100% face-mask adherence in schools,  
384 our model predicted that infections and deaths statewide would have been only 22% greater  
385 than under a scenario with fully remote instruction. In contrast, our model results suggest  
386 that if schools would have operated at full capacity, infections and deaths statewide could have  
387 been one to two orders of magnitude greater than the scenario with fully remote instruction,  
388 especially with poor face-mask adherence in schools. When we extended our model calibration to  
389 account for data from fall 2020, we found that school operating capacity of 80-95% and face-mask  
390 adherence in schools of 40-70% resulted in model predictions most consistent with the observed  
391 data. For reference, data from the National COVID-19 School Response Dashboard [62] indicate  
392 that school operating capacity in Indiana was 77-83% during the fall. Although conditions  
393 elsewhere in the community likely played a role in statewide trends during the fall and were not  
394 accounted for fully by our model, these results demonstrate that transmission associated with  
395 K-12 school reopening was capable of driving the statewide resurgence of COVID-19 observed in  
396 Indiana in fall 2020.

397 The impacts associated with reduced school operating capacity result from reductions in both  
398 the number of contacts within the school and the probability that an infected student would be  
399 in attendance in the first place, similar to the logic behind why smaller gatherings are associated  
400 with reduced risk of transmission [3, 63, 64]. The magnitude of our results was most sensitive  
401 to the degree of protection afforded by face masks, which remains uncertain in school and other  
402 community settings for SARS-CoV-2 [34]. That uncertainty can be reduced as more studies are  
403 conducted. Recently, some studies have shown that face masks offer significant protection in

404 community settings similar to what we assumed. For example, Payne et al. followed 382 U.S.  
405 Navy service members who reported wearing face masks and found a reduced risk of 70% in  
406 those who did [65]. Similar values were found in studies of 124 households in China [66] and 839  
407 close contacts of 211 index cases in Thailand [67].

408 Although the scenarios we considered resulted in projected impacts spanning nearly the full  
409 range between fully remote instruction and fully in-person instruction with no face masks, they  
410 are a simplification of the complexities of how schools likely operated in fall 2020. Scenarios  
411 that we did not explore include different groups of students attending in person or remotely [68],  
412 varying degrees of modularization within schools [69], and the implementation of testing-based  
413 control strategies in schools [70]. In the event that infectiousness is lower for asymptomatic  
414 infections, the impact of school reopening on lower grades could have been lower than our results  
415 suggest. A related simplification of our statewide analysis is that the state, in reality, consists  
416 of a patchwork of policies across districts. In light of this complexity that our model does not  
417 capture, our results should be interpreted with caution in relation to specific counties or school  
418 districts below the state level. Across all scenarios though, our results illustrate the importance  
419 of reduced school operating capacity and maximal face-mask adherence in schools, as do other  
420 modeling studies [68, 69, 70, 71, 72].

421 A critical assumption of our analysis is that children are capable of being infected with SARS-  
422 CoV-2 and transmitting it to others at meaningful levels. Although the burden of severe disease  
423 skews strongly towards older ages [22, 73, 8], there are other lines of evidence that support  
424 our assumption. These include a contact-tracing study that found no distinguishable difference  
425 between infectivity of children and adults [26], several studies that found no distinguishable  
426 difference in viral load between children and adults [74, 40, 39, 75], a study that observed a  
427 greater secondary attack rate among children in homes [26], and a modeling study that found  
428 no evidence that children were less infectious [76]. More direct evidence comes from COVID-19  
429 outbreaks that have been observed in schools, such as one in a high school in Israel in which  
430 13.2% of students and 16.6% of staff were infected in just 10 days [77]. Even more pertinent, since  
431 schools reopened in September 2020, 31,658 COVID-19 cases have been reported in students and  
432 13,240 cases have been reported in teachers and school staff across the state, as of April 2021 [8].

433 There is now a growing body of evidence that school closures contributed to mitigating the  
434 first wave of the epidemic [6, 70] and, as we have shown, may have contributed to the resurgence  
435 of SARS-CoV-2 during fall 2020. Our study adds to this evidence, and suggests an even greater  
436 impact of school reopening than several other studies [72, 70, 69, 78, 68]. This is due in part to our  
437 assumption that asymptomatic and symptomatic infections contribute similarly to transmission  
438 [26, 74, 40, 39, 75], and in part to our model's ability to capture chains of transmission within  
439 schools and extending out into the community. Our study echoes several modeling studies in  
440 emphasizing the importance of reducing school operating capacity to impede transmission [69,  
441 70, 71, 72, 78]. As schools grapple with COVID-19 going forward, results such as these provide  
442 an important basis for motivating the adoption and sustainment of reduced school operating  
443 capacity and adherence to face-mask requirements in schools. As we demonstrated, these actions  
444 are highly consequential for those directly linked to schools and for the communities in which  
445 they are embedded.

## 446 5 Acknowledgements

447 This work was supported by an NSF RAPID grant to TAP (DEB 2027718), an Arthur J. Schmitt  
448 Fellowship and Eck Institute for Global Health Fellowship to RJO, and a Richard and Peggy  
449 Notabaert Premier Fellowship to MP. We thank the University of Notre Dame Center for Research  
450 Computing for computing resources.

## 451 References

- 452 [1] The New York Times. “Coronavirus in the U.S.: Latest Map and Case Count”. en-US. In:  
453 *The New York Times* (July 2020). ISSN: 0362-4331.
- 454 [2] H Juliette T Unwin et al. “State-Level Tracking of COVID-19 in the United States”. In:  
455 *medRxiv* (2020). DOI: [10.1101/2020.07.13.20152355](https://doi.org/10.1101/2020.07.13.20152355). eprint: [https://www.medrxiv.org/  
456 content/early/2020/07/14/2020.07.13.20152355.full.pdf](https://www.medrxiv.org/content/early/2020/07/14/2020.07.13.20152355.full.pdf).
- 457 [3] Seth Flaxman et al. “Estimating the Effects of Non-Pharmaceutical Interventions on COVID-  
458 19 in Europe”. In: *Nature* 584.7820 (Aug. 2020), pp. 257–261. ISSN: 1476-4687. DOI: [10.  
459 1038/s41586-020-2405-7](https://doi.org/10.1038/s41586-020-2405-7).
- 460 [4] *Coronavirus Government Response Tracker*. en. [https://www.bsg.ox.ac.uk/research/research-  
461 projects/coronavirus-government-response-tracker](https://www.bsg.ox.ac.uk/research/research-projects/coronavirus-government-response-tracker).
- 462 [5] Hamada S Badr et al. “Association between Mobility Patterns and COVID-19 Transmission  
463 in the USA: A Mathematical Modelling Study”. In: *The Lancet Infectious Diseases* (2020).  
464 ISSN: 1473-3099. DOI: [10.1016/S1473-3099\(20\)30553-3](https://doi.org/10.1016/S1473-3099(20)30553-3).
- 465 [6] Katherine A. Auger et al. “Association between Statewide School Closure and COVID-19  
466 Incidence and Mortality in the US”. In: *JAMA* (July 2020). ISSN: 0098-7484. DOI: [10.1001/  
467 jama.2020.14348](https://doi.org/10.1001/jama.2020.14348).
- 468 [7] Charles Courtemanche et al. “Strong Social Distancing Measures In The United States  
469 Reduced The COVID-19 Growth Rate: Study Evaluates the Impact of Social Distancing  
470 Measures on the Growth Rate of Confirmed COVID-19 Cases across the United States.”  
471 In: *Health Affairs* (2020), pp. 10–1377.
- 472 [8] *ISDH - Novel Coronavirus: Indiana COVID-19 Dashboard*. <https://www.coronavirus.in.gov/2393.htm>.
- 473 [9] Kenne A. Dibner, Heidi A. Schweingruber, and Dimitri A. Christakis. “Reopening K-12  
474 Schools during the COVID-19 Pandemic: A Report from the National Academies of Sci-  
475 ences, Engineering, and Medicine”. In: *JAMA* (July 2020). ISSN: 0098-7484. DOI: [10.1001/  
476 jama.2020.14745](https://doi.org/10.1001/jama.2020.14745).
- 477 [10] *President Donald J. Trump Is Supporting America’s Students and Families By Encouraging  
478 the Safe Reopening of America’s Schools*. en-US. [https://www.whitehouse.gov/briefings-  
479 statements/president-donald-j-trump-supporting-americas-students-families-encouraging-safe-  
480 reopening-americas-schools/](https://www.whitehouse.gov/briefings-statements/president-donald-j-trump-supporting-americas-students-families-encouraging-safe-reopening-americas-schools/).

- 481 [11] Indiana State Department of Health, Indiana Department of Education, and Indiana Fam-  
482 ily and Social Services Administration. *IN-CLASS: Indiana’s Considerations for Learning*  
483 *and Safe Schools. COVID-19 Health and Safety Re-Entry Guidance*. June 2020.
- 484 [12] Charlotte Jackson et al. “School Closures and Influenza: Systematic Review of Epidemio-  
485 logical Studies”. In: *BMJ Open* 3.2 (2013). ISSN: 2044-6055. DOI: [10.1136/bmjopen-2012-](https://doi.org/10.1136/bmjopen-2012-002149)  
486 [002149](https://doi.org/10.1136/bmjopen-2012-002149). eprint: <https://bmjopen.bmj.com/content/3/2/e002149.full.pdf>.
- 487 [13] Shoko Kawano and Masayuki Kakehashi. “Substantial Impact of School Closure on the  
488 Transmission Dynamics during the Pandemic Flu H1N1-2009 in Oita, Japan”. In: *PLOS*  
489 *ONE* 10.12 (Dec. 2015), pp. 1–15. DOI: [10.1371/journal.pone.0144839](https://doi.org/10.1371/journal.pone.0144839).
- 490 [14] Simon Cauchemez et al. “Closure of Schools during an Influenza Pandemic”. In: *The Lancet*  
491 *Infectious Diseases* 9.8 (2009), pp. 473–481. ISSN: 1473-3099. DOI: [10.1016/S1473-3099\(09\)](https://doi.org/10.1016/S1473-3099(09)70176-8)  
492 [70176-8](https://doi.org/10.1016/S1473-3099(09)70176-8).
- 493 [15] Niel Hens et al. “Estimating the Impact of School Closure on Social Mixing Behaviour  
494 and the Transmission of Close Contact Infections in Eight European Countries”. In: *BMC*  
495 *infectious diseases* 9.1 (2009), p. 187.
- 496 [16] Simon Cauchemez et al. “Estimating the Impact of School Closure on Influenza Transmis-  
497 sion from Sentinel Data”. In: *Nature* 452.7188 (Apr. 2008), pp. 750–754. ISSN: 1476-4687.  
498 DOI: [10.1038/nature06732](https://doi.org/10.1038/nature06732).
- 499 [17] Charlotte Jackson et al. “The Effects of School Closures on Influenza Outbreaks and Pan-  
500 demics: Systematic Review of Simulation Studies”. In: *PLOS ONE* 9.5 (May 2014), pp. 1–  
501 10. DOI: [10.1371/journal.pone.0097297](https://doi.org/10.1371/journal.pone.0097297).
- 502 [18] Sten H Vermund and Virginia E Pitzer. “Asymptomatic Transmission and the Infection  
503 Fatality Risk for COVID-19: Implications for School Reopening”. In: *Clinical Infectious*  
504 *Diseases* (June 2020). ISSN: 1058-4838. DOI: [10.1093/cid/ciaa855](https://doi.org/10.1093/cid/ciaa855).
- 505 [19] Nicholas G. Davies et al. “Age-Dependent Effects in the Transmission and Control of  
506 COVID-19 Epidemics”. In: *Nature Medicine* (June 2020). ISSN: 1546-170X. DOI: [10.1038/](https://doi.org/10.1038/s41591-020-0962-9)  
507 [s41591-020-0962-9](https://doi.org/10.1038/s41591-020-0962-9).
- 508 [20] Juanjuan Zhang et al. “Changes in Contact Patterns Shape the Dynamics of the COVID-  
509 19 Outbreak in China”. In: *Science* 368.6498 (2020), pp. 1481–1486. ISSN: 0036-8075. DOI:  
510 [10.1126/science.abb8001](https://doi.org/10.1126/science.abb8001). eprint: [https://science.sciencemag.org/content/368/6498/1481.](https://science.sciencemag.org/content/368/6498/1481.full.pdf)  
511 [full.pdf](https://science.sciencemag.org/content/368/6498/1481.full.pdf).
- 512 [21] Joseph T Wu et al. “Estimating Clinical Severity of COVID-19 from the Transmission  
513 Dynamics in Wuhan, China”. In: *Nature medicine* (2020), pp. 1–5.
- 514 [22] Robert Verity et al. “Estimates of the Severity of Coronavirus Disease 2019: A Model-  
515 Based Analysis”. eng. In: *The Lancet. Infectious Diseases* (Mar. 2020). ISSN: 1474-4457.  
516 DOI: [10.1016/S1473-3099\(20\)30243-7](https://doi.org/10.1016/S1473-3099(20)30243-7).



- 517 [23] Willem et al. “The Impact of Contact Tracing and Household Bubbles on Deconfinement  
518 Strategies for COVID-19: An Individual-Based Modelling Study”. In: *medRxiv* (2020). DOI:  
519 [10.1101/2020.07.01.20144444](https://doi.org/10.1101/2020.07.01.20144444). eprint: [https://www.medrxiv.org/content/early/2020/07/](https://www.medrxiv.org/content/early/2020/07/06/2020.07.01.20144444.full.pdf)  
520 [06/2020.07.01.20144444.full.pdf](https://www.medrxiv.org/content/early/2020/07/06/2020.07.01.20144444.full.pdf).
- 521 [24] Christine M Szablewski. “SARS-CoV-2 Transmission and Infection among Attendees of an  
522 Overnight Camp—Georgia, June 2020”. In: *MMWR. Morbidity and mortality weekly report*  
523 69 (2020), pp. 1023–1025. DOI: <http://dx.doi.org/10.15585/mmwr.mm6931e1>.
- 524 [25] Young Joon Park et al. “Contact Tracing during Coronavirus Disease Outbreak, South  
525 Korea, 2020”. In: *Emerging Infectious Disease journal* 26.10 (2020). ISSN: 1080-6059. DOI:  
526 [10.3201/eid2610.201315](https://doi.org/10.3201/eid2610.201315).
- 527 [26] Pirous Fateh-Moghadam et al. “Contact Tracing during Phase I of the COVID-19 Pandemic  
528 in the Province of Trento, Italy: Key Findings and Recommendations”. In: *medRxiv* (2020).  
529 DOI: [10.1101/2020.07.16.20127357](https://doi.org/10.1101/2020.07.16.20127357). eprint: [https://www.medrxiv.org/content/early/2020/](https://www.medrxiv.org/content/early/2020/07/29/2020.07.16.20127357.full.pdf)  
530 [07/29/2020.07.16.20127357.full.pdf](https://www.medrxiv.org/content/early/2020/07/29/2020.07.16.20127357.full.pdf).
- 531 [27] George Psacharopoulos et al. “Lost Wages: The COVID-19 Cost of School Closures”. In:  
532 *World Bank Policy Research Working Paper* 9246 (2020).
- 533 [28] Danielle G. Dooley, Asad Bandeaaly, and Megan M. Tschudy. “Low-Income Children and  
534 Coronavirus Disease 2019 (COVID-19) in the US”. In: *JAMA Pediatrics* (May 2020). ISSN:  
535 2168-6203. DOI: [10.1001/jamapediatrics.2020.2065](https://doi.org/10.1001/jamapediatrics.2020.2065). eprint: [https://jamanetwork.com/](https://jamanetwork.com/journals/jamapediatrics/articlepdf/2766115/jamapediatrics%5Btextbackslash%5D__dooley%5Btextbackslash%5D_2020%5Btextbackslash%5D_vp%5Btextbackslash%5D_200021.pdf)  
536 [journals/jamapediatrics/articlepdf/2766115/jamapediatrics\textbackslash\\\_dooley\textb](https://jamanetwork.com/journals/jamapediatrics/articlepdf/2766115/jamapediatrics%5Btextbackslash%5D__dooley%5Btextbackslash%5D_2020%5Btextbackslash%5D_vp%5Btextbackslash%5D_200021.pdf)  
537 [ackslash\\\_2020\textbackslash\\\_vp\textbackslash\\\_200021.pdf](https://jamanetwork.com/journals/jamapediatrics/articlepdf/2766115/jamapediatrics%5Btextbackslash%5D__dooley%5Btextbackslash%5D_2020%5Btextbackslash%5D_vp%5Btextbackslash%5D_200021.pdf).
- 538 [29] Wim Van Lancker and Zachary Parolin. “COVID-19, School Closures, and Child Poverty:  
539 A Social Crisis in the Making”. In: *The Lancet Public Health* 5.5 (2020), e243–e244.
- 540 [30] John J Grefenstette et al. “FRED (A Framework for Reconstructing Epidemic Dynamics):  
541 An Open-Source Software System for Modeling Infectious Diseases and Control Strategies  
542 Using Census-Based Populations”. In: *BMC public health* 13.1 (2013), p. 940.
- 543 [31] Qifang Bi et al. “Epidemiology and Transmission of COVID-19 in 391 Cases and 1286 of  
544 Their Close Contacts in Shenzhen, China: A Retrospective Cohort Study”. In: *The Lancet*  
545 *Infectious Diseases* (2020).
- 546 [32] Stephen A. Lauer et al. “The Incubation Period of Coronavirus Disease 2019 (COVID-19)  
547 From Publicly Reported Confirmed Cases: Estimation and Application”. en. In: *Annals of*  
548 *Internal Medicine* (Mar. 2020). ISSN: 0003-4819. DOI: [10.7326/M20-0504](https://doi.org/10.7326/M20-0504).
- 549 [33] Tapiwa Ganyani et al. “Estimating the Generation Interval for COVID-19 Based on Symp-  
550 tom Onset Data”. en. In: *medRxiv* (Mar. 2020), p. 2020.03.05.20031815. ISSN: 10.1101/2020.03.05.20031815.  
551 DOI: [10.1101/2020.03.05.20031815](https://doi.org/10.1101/2020.03.05.20031815).
- 552 [34] Derek K Chu et al. “Physical Distancing, Face Masks, and Eye Protection to Prevent  
553 Person-to-Person Transmission of SARS-CoV-2 and COVID-19: A Systematic Review and  
554 Meta-Analysis”. In: *The Lancet* (2020).
- 555 [35] W D Wheaton. “2005-2009 U.S. Synthetic Population Ver.2. RTI International”. In: (2012).

- 556 [36] Joël Mossong et al. “Social Contacts and Mixing Patterns Relevant to the Spread of Infec-  
557 tious Diseases”. In: *PLOS Medicine* 5.3 (Mar. 2008), pp. 1–1. DOI: [10.1371/journal.pmed.  
558 0050074](https://doi.org/10.1371/journal.pmed.0050074).
- 559 [37] Kenji Mizumoto et al. “Estimating the Asymptomatic Proportion of Coronavirus Disease  
560 2019 (COVID-19) Cases on Board the Diamond Princess Cruise Ship, Yokohama, Japan,  
561 2020”. en. In: *Eurosurveillance* 25.10 (Mar. 2020), p. 2000180. ISSN: 1560-7917. DOI: [10.  
562 2807/1560-7917.ES.2020.25.10.2000180](https://doi.org/10.2807/1560-7917.ES.2020.25.10.2000180).
- 563 [38] The Novel Coronavirus Pneumonia Emergency Response Epidemiology Team. “The Epi-  
564 demiological Characteristics of an Outbreak of 2019 Novel Coronavirus Diseases (COVID-  
565 19) — China, 2020”. en. In: *China CDC Weekly* 2.8 (Feb. 2020), pp. 113–122. ISSN: 2096-  
566 7071.
- 567 [39] Lael M. Yonker et al. “Pediatric SARS-CoV-2: Clinical Presentation, Infectivity, and Im-  
568 mune Responses”. In: *The Journal of Pediatrics* (). ISSN: 0022-3476. DOI: [10.1016/j.jpeds.  
569 2020.08.037](https://doi.org/10.1016/j.jpeds.2020.08.037).
- 570 [40] Taylor Heald-Sargent et al. “Age-Related Differences in Nasopharyngeal Severe Acute Res-  
571 piratory Syndrome Coronavirus 2 (SARS-CoV-2) Levels in Patients with Mild to Moderate  
572 Coronavirus Disease 2019 (COVID-19)”. In: *JAMA Pediatrics* (July 2020). ISSN: 2168-  
573 6203. DOI: [10.1001/jamapediatrics.2020.3651](https://doi.org/10.1001/jamapediatrics.2020.3651). eprint: [https://jamanetwork.com/journals/  
574 jamapediatrics/articlepdf/2768952/jamapediatrics\textbackslash\\\_healdsargent\textbac  
575 kslash\\\_2020\textbackslash\\\_ld\textbackslash\\\_200036.pdf](https://jamanetwork.com/journals/jamapediatrics/articlepdf/2768952/jamapediatrics%20textbackslash%20healdsargent%20textbackslash%202020%20textbackslash%20ld%20textbackslash%20200036.pdf).
- 576 [41] Shixiong Hu et al. “Infectivity, Susceptibility, and Risk Factors Associated with SARS-CoV-  
577 2 Transmission under Intensive Contact Tracing in Hunan, China”. In: *medRxiv* (2020).  
578 DOI: [10.1101/2020.07.23.20160317](https://doi.org/10.1101/2020.07.23.20160317). eprint: [https://www.medrxiv.org/content/early/2020/  
579 08/07/2020.07.23.20160317.full.pdf](https://www.medrxiv.org/content/early/2020/08/07/2020.07.23.20160317.full.pdf).
- 580 [42] T Alex Perkins et al. “Calling in Sick: Impacts of Fever on Intra-Urban Human Mobility”.  
581 In: *Proceedings of the Royal Society of London B: Biological Sciences* 283.1834 (2016). ISSN:  
582 0962-8452. DOI: [10.1098/rspb.2016.0390](https://doi.org/10.1098/rspb.2016.0390).
- 583 [43] Team CDC COVID et al. “Characteristics of Health Care Personnel with COVID-19-United  
584 States, February 12-April 9, 2020.” In: *MMWR. Morbidity and Mortality Weekly Report*  
585 (2020).
- 586 [44] "State of Indiana". *Executive Order 20-16*.
- 587 [45] Jiang Wu et al. “Risk Factors for SARS among Persons without Known Contact with SARS  
588 Patients, Beijing, China”. In: *Emerging Infectious Disease journal* 10.2 (2004), p. 210. ISSN:  
589 1080-6059. DOI: [10.3201/eid1002.030730](https://doi.org/10.3201/eid1002.030730).
- 590 [46] *COVID-19 Community Mobility Report*. <https://www.google.com/covid19/mobility?hl=en>.
- 591 [47] Christopher J Cronin and William N Evans. *Private Precaution and Public Restrictions: What Drives Social Distancing and Industry Foot Traffic in the COVID-19 Era?* Working  
592 Paper 27531. National Bureau of Economic Research, July 2020. DOI: [10.3386/w27531](https://doi.org/10.3386/w27531).
- 593 [48] *Google Trends*. en-US. <https://trends.google.com/trends/?geo=US>.

- 595 [49] New York Times and Dynata. *Estimates from The New York Times, Based on Roughly*  
596 *250,000 Interviews Conducted by Dynata from July 2 to July 14*. Tech. rep.
- 597 [50] The COVID Tracking Project. *Michigan*. en. <https://covidtracking.com/data/state/michigan>.  
598 2020.
- 599 [51] Aaron A. King et al. *pomp: Statistical Inference for Partially Observed Markov Processes*.  
600 Manual. 2020.
- 601 [52] Aaron A. King, Dao Nguyen, and Edward L. Ionides. “Statistical Inference for Partially  
602 Observed Markov Processes via the R Package pomp”. In: *Journal of Statistical Software*  
603 69.12 (2016), pp. 1–43. DOI: [10.18637/jss.v069.i12](https://doi.org/10.18637/jss.v069.i12).
- 604 [53] Nir Menachemi et al. “Population Point Prevalence of SARS-CoV-2 Infection Based on  
605 a Statewide Random Sample—Indiana, April 25–29, 2020”. In: *Morbidity and Mortality*  
606 *Weekly Report* 69.29 (2020), p. 960.
- 607 [54] Andrea Zeek. *COVID-19 Study’s Phase 2 Results Show Spread of Virus in Indiana*. en.  
608 [https://news.iu.edu/stories/2020/06/iupui/releases/17-fairbanks-isdh-second-phase-covid-](https://news.iu.edu/stories/2020/06/iupui/releases/17-fairbanks-isdh-second-phase-covid-19-testing-indiana-research.html)  
609 [19-testing-indiana-research.html](https://news.iu.edu/stories/2020/06/iupui/releases/17-fairbanks-isdh-second-phase-covid-19-testing-indiana-research.html). June 2020.
- 610 [55] Christophe Fraser. “Estimating Individual and Household Reproduction Numbers in an  
611 Emerging Epidemic”. In: *PLOS ONE* 2.8 (Aug. 2007), pp. 1–12. DOI: [10.1371/journal.](https://doi.org/10.1371/journal.pone.0000758)  
612 [pone.0000758](https://doi.org/10.1371/journal.pone.0000758).
- 613 [56] Mark Stevenson with contributions from Telmo Nunes et al. *epiR: Tools for the Analysis*  
614 *of Epidemiological Data*. Manual. 2020.
- 615 [57] T. Alex Perkins et al. “Estimating Unobserved SARS-CoV-2 Infections in the United  
616 States”. In: *Proceedings of the National Academy of Sciences* (2020). ISSN: 0027-8424. DOI:  
617 [10.1073/pnas.2005476117](https://doi.org/10.1073/pnas.2005476117). eprint: [https://www.pnas.org/content/early/2020/08/20/](https://www.pnas.org/content/early/2020/08/20/2005476117.full.pdf)  
618 [2005476117.full.pdf](https://www.pnas.org/content/early/2020/08/20/2005476117.full.pdf).
- 619 [58] *MIDAS Network, Midas-Network/COVID-19*. GitHub. [https://github.com/midas-net-work/COVID-](https://github.com/midas-net-work/COVID-19)  
620 [19](https://github.com/midas-net-work/COVID-19).
- 621 [59] Jesús Fernández-Villaverde and Charles I Jones. *Estimating and Simulating a SIRD Model*  
622 *of COVID-19 for Many Countries, States, and Cities*. Working Paper 27128. National  
623 Bureau of Economic Research, May 2020. DOI: [10.3386/w27128](https://doi.org/10.3386/w27128).
- 624 [60] George Mohler et al. “Analyzing the Impacts of Public Policy on COVID-19 Transmission:  
625 A Case Study of the Role of Model and Dataset Selection Using Data from Indiana”. In:  
626 *Statistics and Public Policy* 8.1 (2021), pp. 1–8. DOI: [10.1080/2330443X.2020.1859030](https://doi.org/10.1080/2330443X.2020.1859030).  
627 eprint: <https://doi.org/10.1080/2330443X.2020.1859030>.
- 628 [61] Susanna Esposito and Nicola Principi. “School Closure during the Coronavirus Disease  
629 2019 (COVID-19) Pandemic: An Effective Intervention at the Global Level?” In: *JAMA*  
630 *Pediatrics* (May 2020). ISSN: 2168-6203. DOI: [10.1001/jamapediatrics.2020.1892](https://doi.org/10.1001/jamapediatrics.2020.1892). eprint:  
631 [https://jamanetwork.com/journals/jamapediatrics/articlepdf/2766114/jamapediatrics\te](https://jamanetwork.com/journals/jamapediatrics/articlepdf/2766114/jamapediatrics%20xtbackslash%5Fesposito%20xtbackslash%5F2020%20xtbackslash%5Fvp%20xtbackslash%5F200019.pdf)  
632 [xtbackslash%5Fesposito%20xtbackslash%5F2020%20xtbackslash%5Fvp%20xtbackslash%5F200019.](https://jamanetwork.com/journals/jamapediatrics/articlepdf/2766114/jamapediatrics%20xtbackslash%5Fesposito%20xtbackslash%5F2020%20xtbackslash%5Fvp%20xtbackslash%5F200019.pdf)  
633 [pdf](https://jamanetwork.com/journals/jamapediatrics/articlepdf/2766114/jamapediatrics%20xtbackslash%5Fesposito%20xtbackslash%5F2020%20xtbackslash%5Fvp%20xtbackslash%5F200019.pdf).

- 634 [62] *COVID-19 Resource Hub: STATS Indiana*. <https://www.stats.indiana.edu/topic/covid19.asp>.
- 635 [63] Nor Fazila Che Mat et al. “A Single Mass Gathering Resulted in Massive Transmission  
636 of COVID-19 Infections in Malaysia with Further International Spread”. In: *Journal of*  
637 *Travel Medicine* 27.3 (Apr. 2020). ISSN: 1708-8305. DOI: [10.1093/jtm/taaa059](https://doi.org/10.1093/jtm/taaa059). eprint:  
638 <https://academic.oup.com/jtm/article-pdf/27/3/taaa059/33226391/taaa059.pdf>.
- 639 [64] Sukbin Jang, Si Hyun Han, and Ji-Young Rhee. “Cluster of Coronavirus Disease Associated  
640 with Fitness Dance Classes, South Korea”. eng. In: *Emerging infectious diseases* 26.8 (Aug.  
641 2020), pp. 1917–1920. ISSN: 1080-6059. DOI: [10.3201/eid2608.200633](https://doi.org/10.3201/eid2608.200633).
- 642 [65] Daniel C Payne et al. “SARS-CoV-2 Infections and Serologic Responses from a Sample  
643 of US Navy Service Members—USS Theodore Roosevelt, April 2020”. In: *Morbidity and*  
644 *Mortality Weekly Report* 69.23 (2020), p. 714.
- 645 [66] Yu Wang et al. “Reduction of Secondary Transmission of SARS-CoV-2 in Households by  
646 Face Mask Use, Disinfection and Social Distancing: A Cohort Study in Beijing, China”. In:  
647 *BMJ global health* 5.5 (2020), e002794.
- 648 [67] Pawinee Doung-Ngern et al. “Case-Control Study of Use of Personal Protective Measures  
649 and Risk for SARS-CoV 2 Infection, Thailand”. In: *Emerging Infectious Diseases* 26.11  
650 (2020), p. 2607.
- 651 [68] Matt J Keeling et al. “The Impact of School Reopening on the Spread of COVID-19 in  
652 England”. In: *medRxiv* (2020). DOI: [10.1101/2020.06.04.20121434](https://doi.org/10.1101/2020.06.04.20121434). eprint: [https://www.  
653 medrxiv.org/content/early/2020/06/05/2020.06.04.20121434.full.pdf](https://www.medrxiv.org/content/early/2020/06/05/2020.06.04.20121434.full.pdf).
- 654 [69] Jennifer R Head et al. “The Effect of School Closures and Reopening Strategies on COVID-  
655 19 Infection Dynamics in the San Francisco Bay Area: A Cross-Sectional Survey and Mod-  
656 eling Analysis”. In: *medRxiv* (2020). DOI: [10.1101/2020.08.06.20169797](https://doi.org/10.1101/2020.08.06.20169797). eprint: [https:  
657 //www.medrxiv.org/content/early/2020/08/07/2020.08.06.20169797.full.pdf](https://www.medrxiv.org/content/early/2020/08/07/2020.08.06.20169797.full.pdf).
- 658 [70] Jasmina Panovska-Griffiths et al. “Determining the Optimal Strategy for Reopening Schools,  
659 the Impact of Test and Trace Interventions, and the Risk of Occurrence of a Second COVID-  
660 19 Epidemic Wave in the UK: A Modelling Study”. In: *The Lancet Child & Adolescent*  
661 *Health* (2020). ISSN: 2352-4642. DOI: [10.1016/S2352-4642\(20\)30250-9](https://doi.org/10.1016/S2352-4642(20)30250-9).
- 662 [71] Benjamin Lee et al. “Modeling the Impact of School Reopening on SARS-CoV-2 Trans-  
663 mission”. In: *Research Square* (2020).
- 664 [72] Alfonso Landeros et al. “An Examination of School Reopening Strategies during the SARS-  
665 CoV-2 Pandemic”. In: *medRxiv* (2020). DOI: [10.1101/2020.08.05.20169086](https://doi.org/10.1101/2020.08.05.20169086). eprint: [https:  
666 //www.medrxiv.org/content/early/2020/08/06/2020.08.05.20169086.full.pdf](https://www.medrxiv.org/content/early/2020/08/06/2020.08.05.20169086.full.pdf).
- 667 [73] *COVID-19 Hospitalizations*. [https://gis.cdc.gov/grasp/COVIDNet/COVID19\\_3.html](https://gis.cdc.gov/grasp/COVIDNet/COVID19_3.html).
- 668 [74] Enrico Lavezzo et al. “Suppression of a SARS-CoV-2 Outbreak in the Italian Municipality of  
669 Vo”. In: *Nature* 584.7821 (Aug. 2020), pp. 425–429. ISSN: 1476-4687. DOI: [10.1038/s41586-  
670 020-2488-1](https://doi.org/10.1038/s41586-020-2488-1).

- 671 [75] Terry C Jones et al. “An Analysis of SARS-CoV-2 Viral Load by Patient Age”. In: *medRxiv*  
672 (2020). DOI: [10.1101/2020.06.08.20125484](https://doi.org/10.1101/2020.06.08.20125484). eprint: [https://www.medrxiv.org/content/  
673 early/2020/06/09/2020.06.08.20125484.full.pdf](https://www.medrxiv.org/content/early/2020/06/09/2020.06.08.20125484.full.pdf).
- 674 [76] Itai Dattner et al. “The Role of Children in the Spread of COVID-19: Using Household  
675 Data from Bnei Brak, Israel, to Estimate the Relative Susceptibility and Infectivity of  
676 Children”. In: *medRxiv* (2020). DOI: [10.1101/2020.06.03.20121145](https://doi.org/10.1101/2020.06.03.20121145). eprint: [https://www.  
677 medrxiv.org/content/early/2020/06/05/2020.06.03.20121145.full.pdf](https://www.medrxiv.org/content/early/2020/06/05/2020.06.03.20121145.full.pdf).
- 678 [77] Chen Stein-Zamir et al. “A Large COVID-19 Outbreak in a High School 10 Days after  
679 Schools’ Reopening, Israel, May 2020”. In: *Eurosurveillance* 25.29 (2020), p. 2001352. DOI:  
680 [10.2807/1560-7917.ES.2020.25.29.2001352](https://doi.org/10.2807/1560-7917.ES.2020.25.29.2001352).
- 681 [78] Elaheh Abdollahi et al. “Simulating the Effect of School Closure during COVID-19 Out-  
682 breaks in Ontario, Canada”. In: *BMC Medicine* 18.1 (July 2020), p. 230. ISSN: 1741-7015.  
683 DOI: [10.1186/s12916-020-01705-8](https://doi.org/10.1186/s12916-020-01705-8).
- 684 [79] *World Population Prospects - Population Division - United Nations*. <https://population.un.org/wpp/DataQu>
- 685 [80] Jon C Emery et al. “The Contribution of Asymptomatic SARS-CoV-2 Infections to Trans-  
686 mission on the Diamond Princess Cruise Ship”. In: *eLife* 9 (Aug. 2020). Ed. by Marc  
687 Lipsitch, Eduardo Franco, and Marc Lipsitch, e58699. ISSN: 2050-084X. DOI: [10.7554/  
688 eLife.58699](https://doi.org/10.7554/eLife.58699).
- 689 [81] IHME COVID-19 health service utilization forecasting Team and Christopher JL Murray.  
690 “Forecasting COVID-19 Impact on Hospital Bed-Days, ICU-Days, Ventilator-Days and  
691 Deaths by US State in the next 4 Months”. en. In: *medRxiv* (Mar. 2020), p. 2020.03.27.20043752.  
692 DOI: [10.1101/2020.03.27.20043752](https://doi.org/10.1101/2020.03.27.20043752).

## 1 Supplementary material

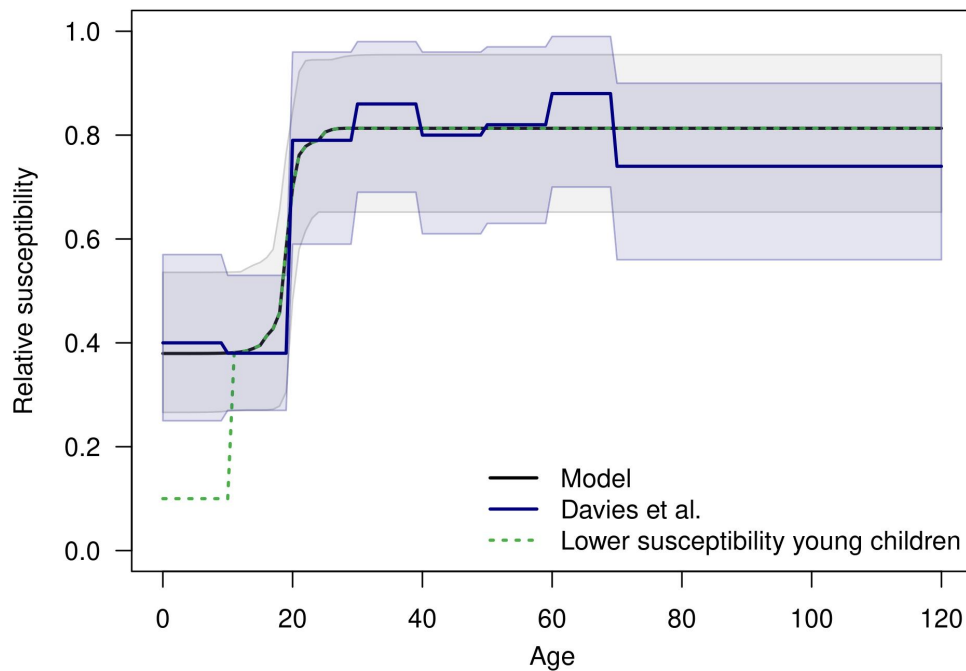

Figure S1. Susceptibility to SARS-CoV-2 infection by age. The black line shows the median of the estimated curve of susceptibility by age, which took the form of a modified logistic function defined by four parameters: minimum, maximum, inflection point, and slope. The gray band represents the 95% credible interval. Navy lines show estimates from Davies et al. [19] that were used to inform our estimates. The dashed green line shows an alternative scenario with lower susceptibility for children under 10 years of age.



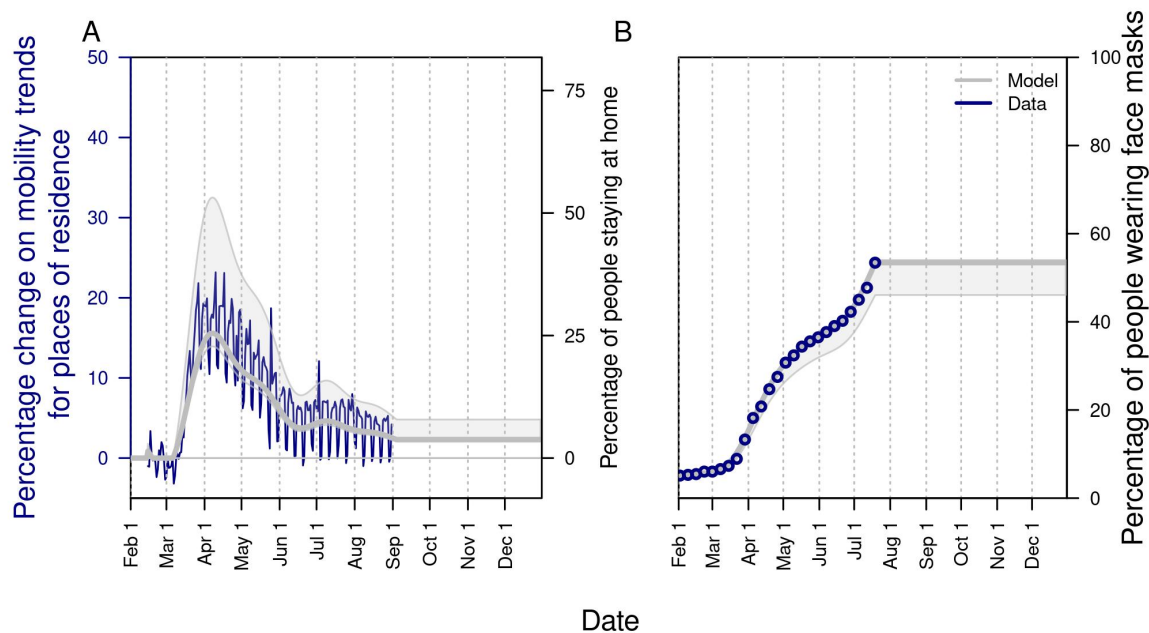

Figure S2. Changes in A) mobility patterns over time and B) face-mask adherence in the community as a whole. In A, the gray line shows the fitted pattern for the Google mobility index related to residential locations (navy line). Adherence to shelter-in-place in the model follows the same trend, but with its magnitude estimated through the model calibration process. In B, the gray line is informed by fitting to Google search data on “face mask” and assuming that values plateau from July 19 onward at a value informed by survey data [48, 49].

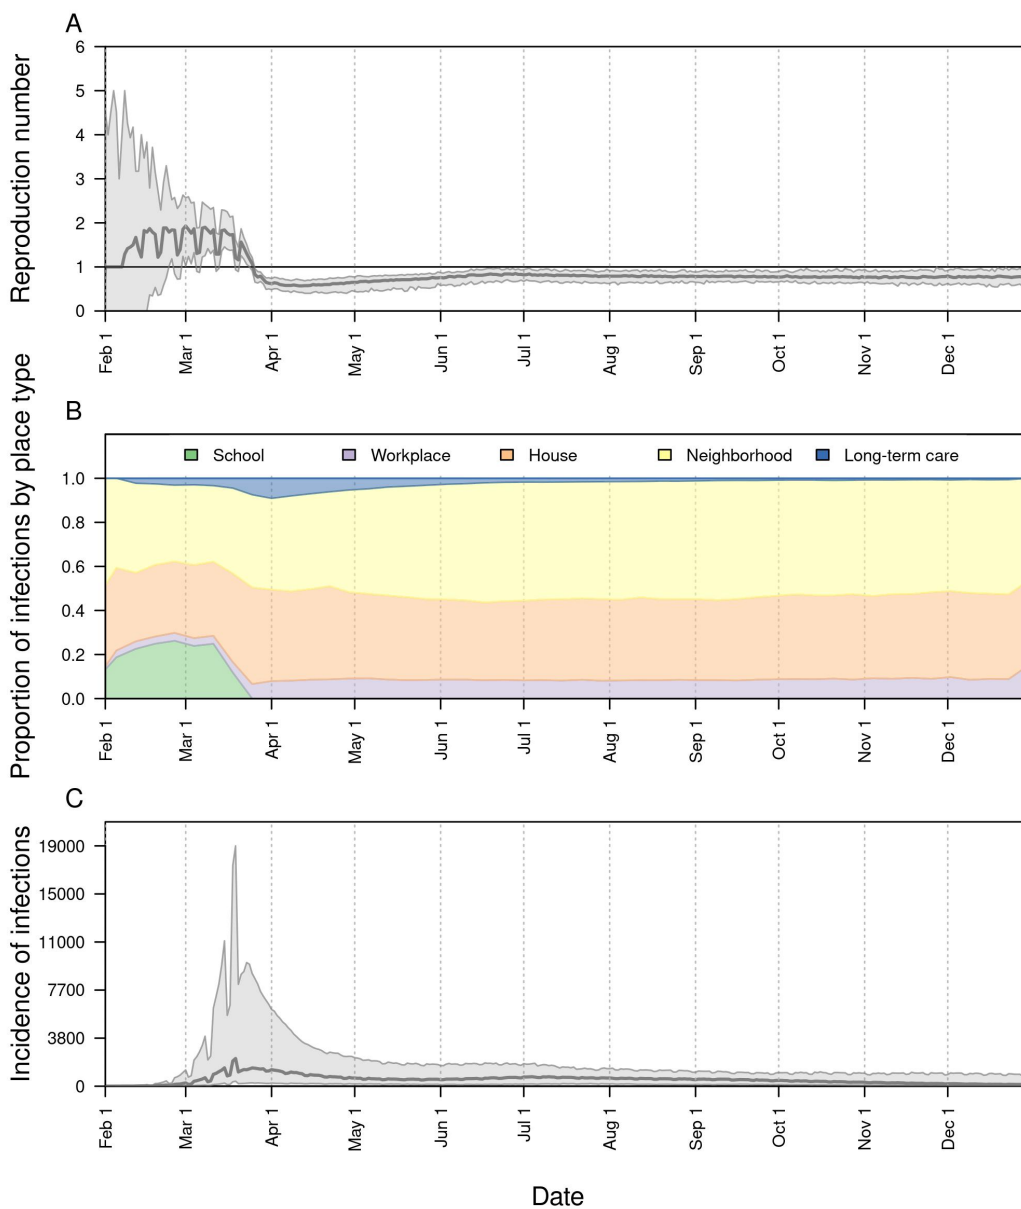

Figure S3. The impact of remote instruction (i.e., 0% school operating capacity). Model outputs shown include: A) the reproduction number,  $R(t)$ , over time; B) the proportion of infections acquired in different location types (colors) over time; and C) the daily incidence of infection statewide over time. In A and C, the line represents the median, and the shaded region represents the 50% posterior predictive interval.

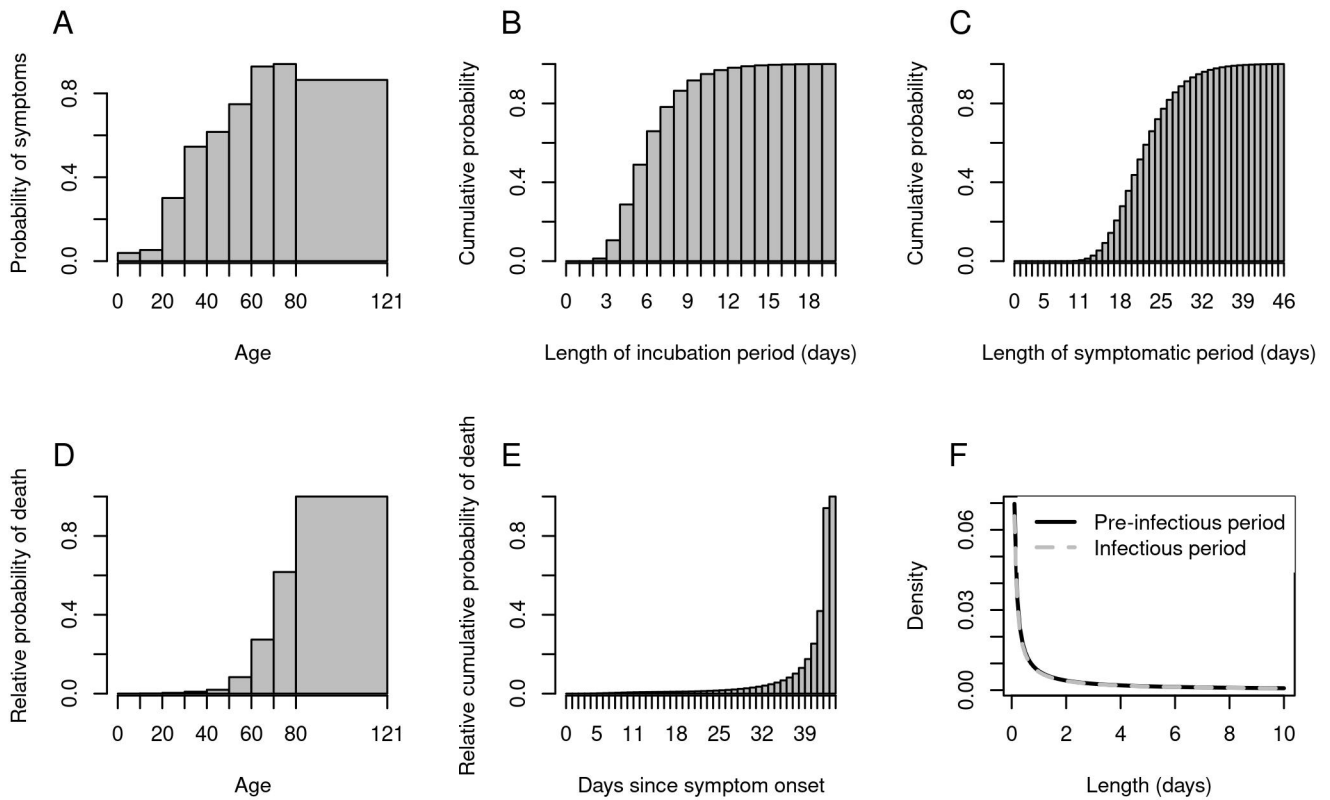

Figure S4. Distributional representations of select model parameters: A) probability of symptoms by age group; B) cumulative probability of the duration of the incubation period; C) cumulative probability of the duration of the symptomatic period; D) relative probability of death by age; E) cumulative probability of death by day after symptom onset; and F) density of duration of the pre-infectious and infectious periods.

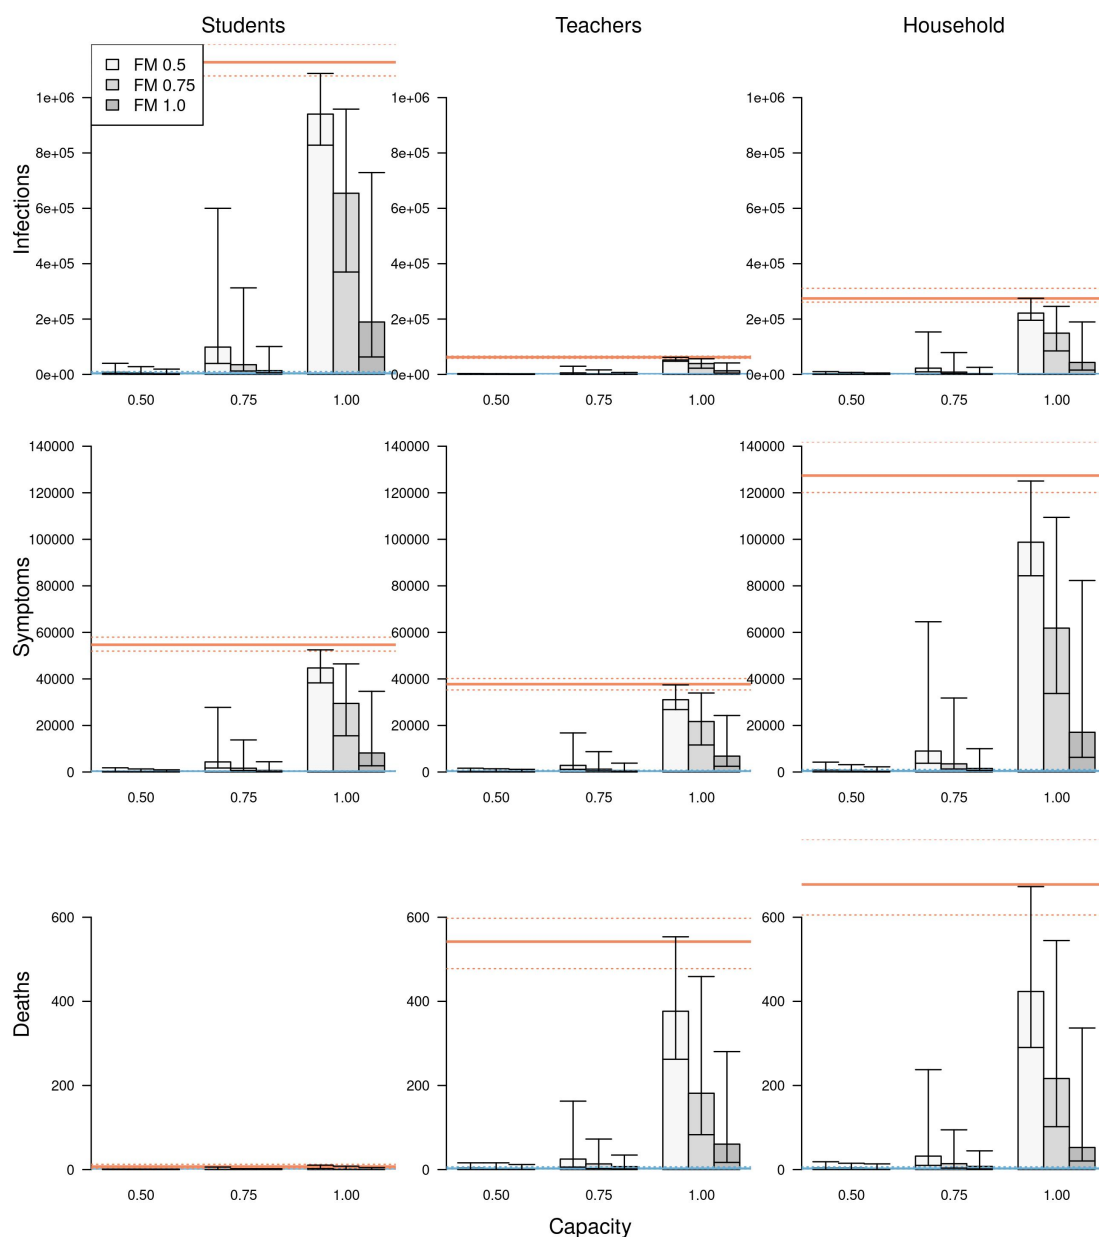

Figure S5. The impact of different scenarios about conditions for school reopening on infections (top row), symptomatic infections (middle row), and deaths (bottom row) cumulatively between August 24 and December 31 across the state of Indiana. These outcomes are presented separately for students (left column), teachers (middle column), and school-affiliated families (right column). Scenarios are defined by school operating capacity (x-axis) and face-mask adherence in schools (shading). Orange lines represent projections under a scenario of school reopening at full capacity without masks (solid: median; dotted: 95% posterior predictive interval). Blue lines represent a scenario where schools operate remotely. Error bars indicate inter-quartile ranges.

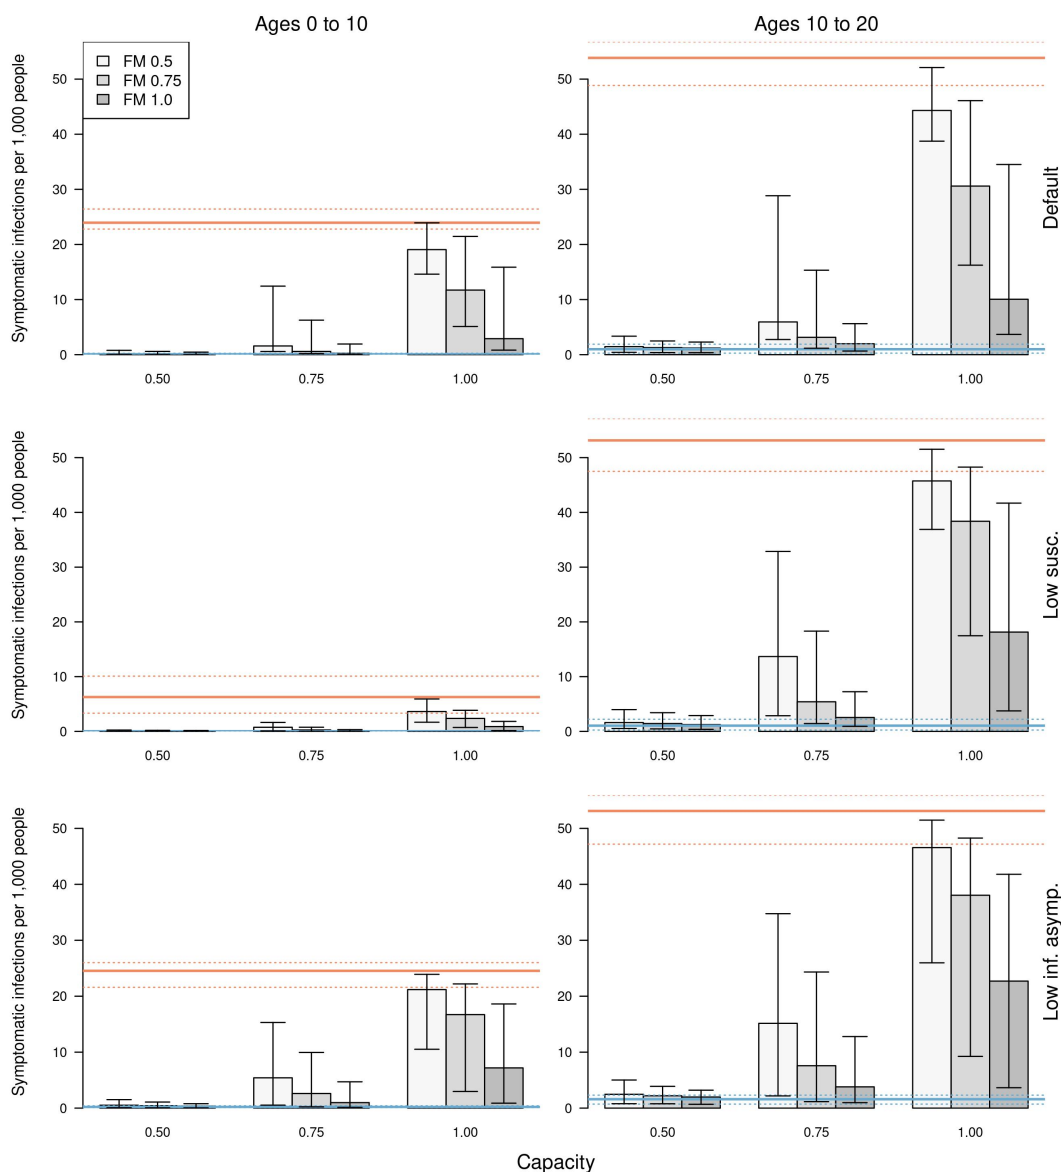

Figure S6. The impact of different scenarios about conditions for school reopening on cumulative symptomatic infections per 1,000 people for ages 0-10 (left column) and 10-20 (right column). Results are shown under: (top row) the baseline assumption for susceptibility and infectiousness of asymptomatic infections; (middle row) lower susceptibility for children under 10 years of age; and (bottom row) the baseline assumption for susceptibility but with lower infectiousness of asymptomatic infections. Scenarios are defined by school operating capacity (x-axis) and face-mask adherence in schools (shading). Orange lines represent projections under a scenario of school reopening at full capacity without masks (solid: median; dotted: 95% posterior predictive interval). Blue lines represent a scenario where schools operate remotely. Error bars indicate inter-quartile ranges.

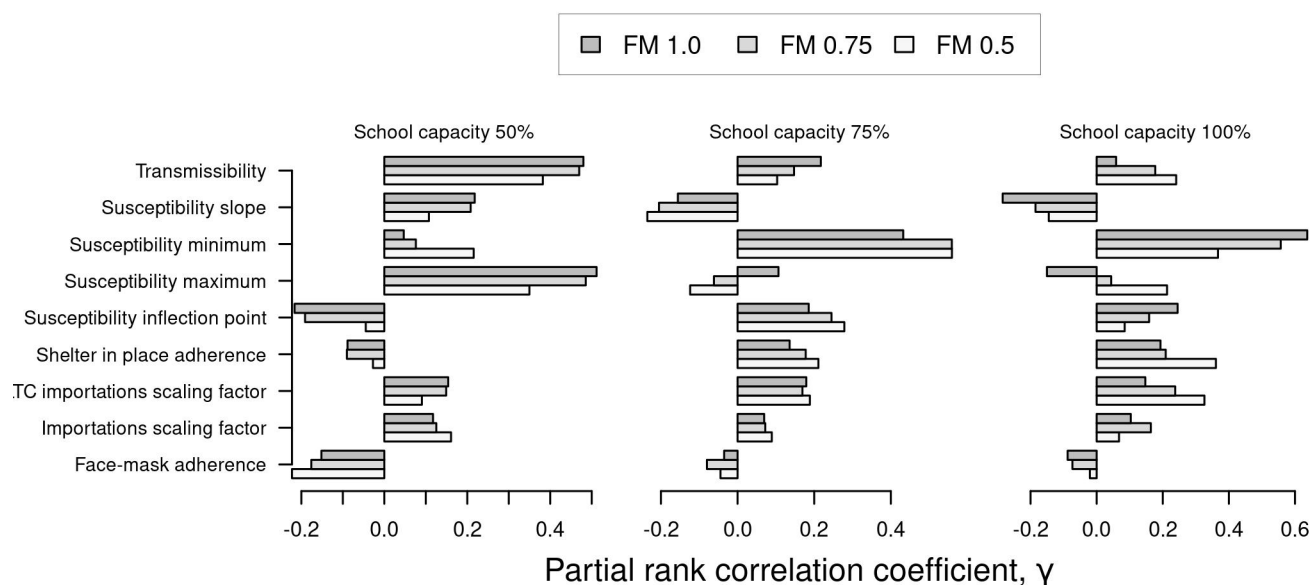

Figure S7. Sensitivity analysis of cumulative infections statewide between August 24 and December 31 to variation in the model's nine calibrated parameters. Bars indicate values of the partial rank correlation coefficient. Results are presented separately by school operating capacity (panels) and face-mask adherence in schools (gray shading).



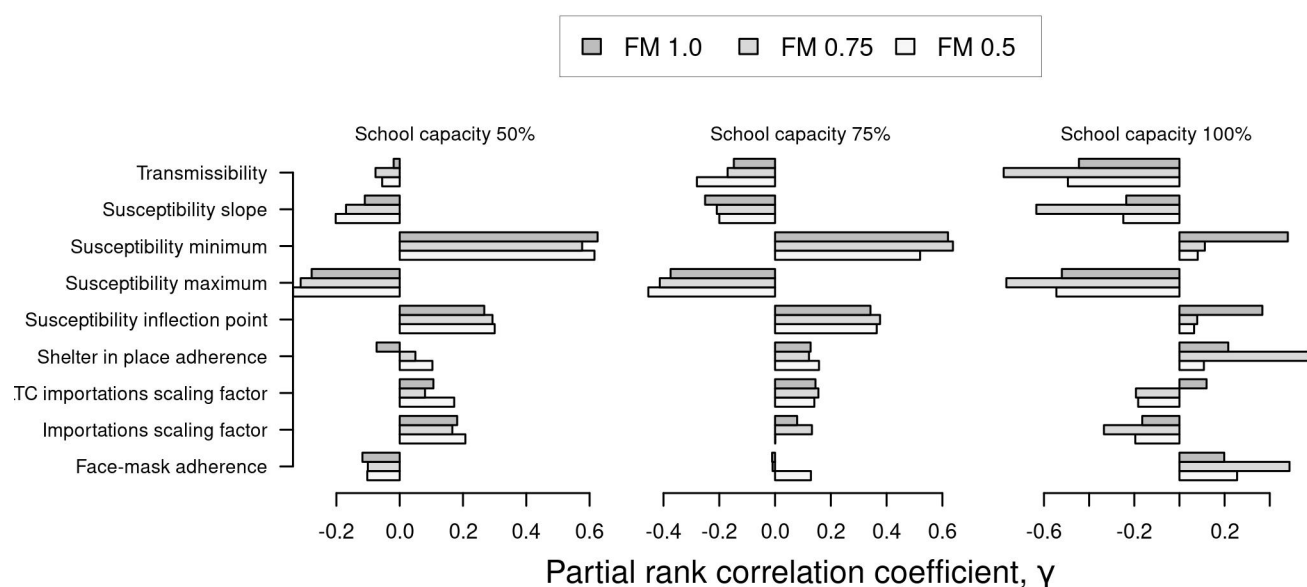

Figure S8. Sensitivity analysis of the proportion of infections acquired in schools between August 24 and December 31 to variation in the model's nine calibrated parameters. Bars indicate values of the partial rank correlation coefficient. Results are presented separately by school operating capacity (panels) and face-mask adherence in schools (gray shading).

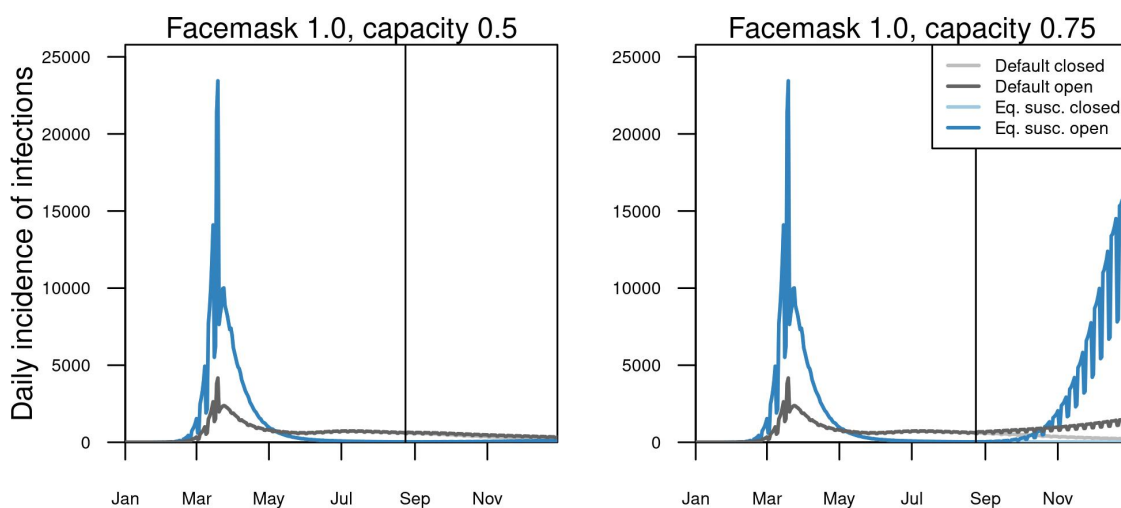

Figure S9. Comparison of median daily incidence of infection statewide in Indiana under alternative model assumptions and conditions in schools. Default model assumptions (gray) are contrasted with an alternative assumption of equal susceptibility for all ages (blue). A baseline scenario of schools operating remotely (light) is contrasted with two scenarios with schools reopened (dark): school operating capacity at 50% (left) or 75% (right). Face-mask adherence in schools was assumed to be 100% in both scenarios. The date on which schools reopened in the fall (August 24) is indicated by the vertical line.

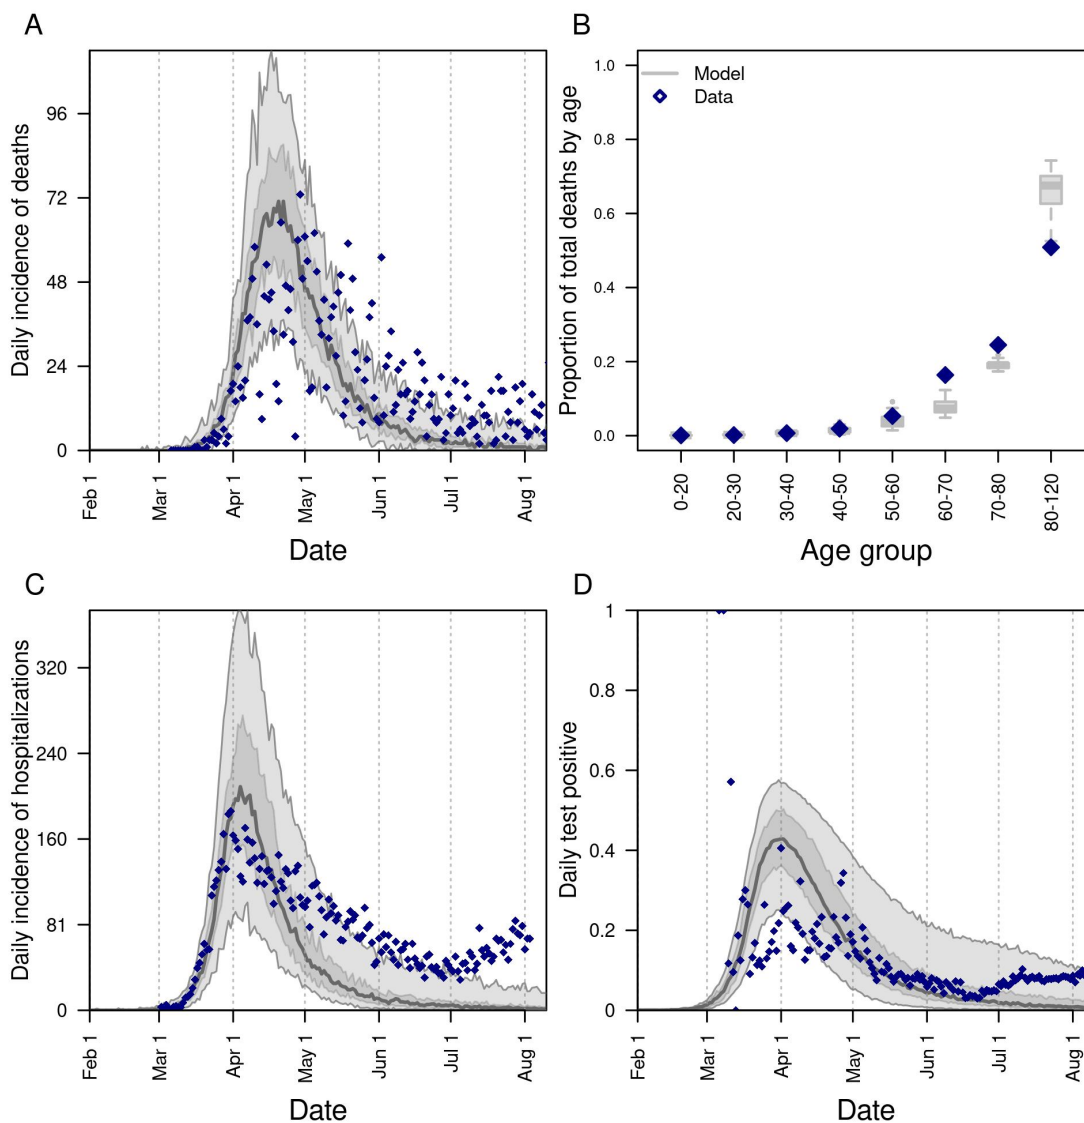

Figure S10. Model calibration to statewide data under an alternative assumption of equal susceptibility for all ages: A) daily incidence of death; B) proportion of deaths through July 13 in decadal age bins; C) daily incidence of hospitalization; and D) daily proportion of tests administered that are positive for SARS-CoV-2. In all panels, blue diamonds represent data. In A, C, and D, the gray line is the median, the dark shaded region the 50% posterior predictive interval, and the light shaded region the 95% posterior predictive interval.

| Capacity | Facemask | Cumulative infections | Cumulative deaths |
|----------|----------|-----------------------|-------------------|
| 0.50     | 0.50     | 1.56 (1.48-1.64)      | 1.19 (1.14-1.24)  |
| 0.50     | 0.75     | 1.34 (1.28-1.41)      | 1.13 (1.09-1.18)  |
| 0.50     | 1.00     | 1.22 (1.16-1.28)      | 1.09 (1.04-1.13)  |
| 0.75     | 0.50     | 10.66 (10.06-11.28)   | 2.64 (2.53-2.75)  |
| 0.75     | 0.75     | 4.94 (4.63-5.28)      | 1.81 (1.74-1.89)  |
| 0.75     | 1.00     | 2.39 (2.26-2.52)      | 1.39 (1.33-1.45)  |
| 1.00     | 0.50     | 42.81 (41.44-44.44)   | 9.22 (8.91-9.55)  |
| 1.00     | 0.75     | 30.92 (29.82-32.10)   | 6.18 (5.96-6.43)  |
| 1.00     | 1.00     | 14.31 (13.58-15.10)   | 3.30 (3.18-3.44)  |

Table S1. Proportional increase in risk of infection and death for the overall population of Indiana under alternative scenarios about school operating capacity and face-mask adherence in schools. We define the proportional increase in risk as the ratio of the cumulative number of events (infections or deaths) between August 24 and December 31 under the scenario indicated by the left two columns as compared to a scenario in which schools operate remotely.

| Capacity | Facemask | Student infections  | Student symptoms    |
|----------|----------|---------------------|---------------------|
| 0.50     | 0.50     | 3.3 (3.1-3.5)       | 3.1 (2.9-3.3)       |
| 0.50     | 0.75     | 2.4 (2.3-2.5)       | 2.3 (2.2-2.4)       |
| 0.50     | 1.00     | 1.8 (1.7-1.9)       | 1.8 (1.7-1.9)       |
| 0.75     | 0.50     | 56.5 (53.1-60.1)    | 49.0 (45.6-52.3)    |
| 0.75     | 0.75     | 21.8 (20.3-23.6)    | 18.9 (17.6-20.3)    |
| 0.75     | 1.00     | 7.4 (6.9-7.9)       | 6.6 (6.2-7.1)       |
| 1.00     | 0.50     | 251.0 (241.2-260.9) | 236.4 (227.8-246.7) |
| 1.00     | 0.75     | 178.2 (170.1-186.1) | 162.8 (155.5-169.7) |
| 1.00     | 1.00     | 76.6 (72.1-81.3)    | 67.7 (63.6-71.7)    |

Table S2. Proportional increase in risk of infection and symptomatic infection for students under alternative scenarios about school operating capacity and face-mask adherence in schools. We define the proportional increase in risk as the ratio of the cumulative number of events (infections or symptomatic infections) between August 24 and December 31 under the scenario indicated by the left two columns as compared to a scenario in which schools operate remotely.

| Capacity | Facemask | Teacher infections  | Teacher symptoms    | Teacher deaths      |
|----------|----------|---------------------|---------------------|---------------------|
| 0.50     | 0.50     | 2.1 (2.0-2.2)       | 2.0 (1.9-2.2)       | 2.0 (1.9-2.2)       |
| 0.50     | 0.75     | 1.7 (1.6-1.8)       | 1.7 (1.6-1.8)       | 1.8 (1.7-2.0)       |
| 0.50     | 1.00     | 1.5 (1.4-1.6)       | 1.5 (1.4-1.6)       | 1.6 (1.5-1.7)       |
| 0.75     | 0.50     | 24.8 (23.2-26.5)    | 23.6 (22.1-25.1)    | 22.0 (20.2-23.7)    |
| 0.75     | 0.75     | 10.7 (10.0-11.5)    | 10.1 (9.4-10.9)     | 9.8 (9.1-10.6)      |
| 0.75     | 1.00     | 4.5 (4.2-4.8)       | 4.4 (4.1-4.7)       | 4.4 (4.1-4.7)       |
| 1.00     | 0.50     | 119.5 (114.6-125.0) | 126.7 (120.8-132.9) | 166.1 (157.4-175.6) |
| 1.00     | 0.75     | 88.8 (84.9-93.1)    | 90.2 (86.0-94.8)    | 102.7 (96.6-109.6)  |
| 1.00     | 1.00     | 41.8 (39.5-44.3)    | 41.0 (38.5-43.7)    | 41.1 (38.5-44.1)    |

Table S3. Proportional increase in risk of infection, symptomatic infection, and death for teachers under alternative scenarios about school operating capacity and face-mask adherence in schools. We define the proportional increase in risk as the ratio of the cumulative number of events (infections, symptomatic infections, or deaths) between August 24 and December 31 under the scenario indicated by the left two columns as compared to a scenario in which schools operate remotely.



| Capacity | Facemask | Family infections   | Family symptoms     | Family deaths       |
|----------|----------|---------------------|---------------------|---------------------|
| 0.50     | 0.50     | 3.5 (3.3-3.7)       | 3.3 (3.1-3.5)       | 2.8 (2.6-3.0)       |
| 0.50     | 0.75     | 2.5 (2.3-2.6)       | 2.4 (2.2-2.5)       | 2.3 (2.2-2.5)       |
| 0.50     | 1.00     | 1.9 (1.8-2.0)       | 1.9 (1.8-2.0)       | 1.9 (1.7-2.0)       |
| 0.75     | 0.50     | 55.8 (52.2-59.5)    | 49.3 (46.0-52.5)    | 32.5 (30.0-35.5)    |
| 0.75     | 0.75     | 22.1 (20.5-23.6)    | 19.4 (18.0-20.8)    | 13.3 (12.3-14.4)    |
| 0.75     | 1.00     | 7.7 (7.2-8.3)       | 7.0 (6.6-7.6)       | 5.7 (5.3-6.1)       |
| 1.00     | 0.50     | 253.1 (242.4-263.4) | 249.1 (239.9-259.3) | 222.7 (211.2-236.5) |
| 1.00     | 0.75     | 177.7 (169.9-186.8) | 168.6 (161.4-176.2) | 132.0 (124.4-140.0) |
| 1.00     | 1.00     | 77.0 (72.6-81.7)    | 69.5 (65.4-73.8)    | 48.4 (44.8-52.2)    |

Table S4. Proportional increase in risk of infection, symptomatic infection, and death for family members of students and teachers under alternative scenarios about school operating capacity and face-mask adherence in schools. We define the proportional increase in risk as the ratio of the cumulative number of events (infections, symptomatic infections, or deaths) between August 24 and December 31 under the scenario indicated by the left two columns as compared to a scenario in which schools operate remotely.

| Capacity | Facemask | Cumulative infections | Cumulative deaths |
|----------|----------|-----------------------|-------------------|
| 0.50     | 0.50     | 0.03 (0.03-0.03)      | 0.09 (0.09-0.10)  |
| 0.50     | 0.75     | 0.03 (0.03-0.03)      | 0.09 (0.09-0.09)  |
| 0.50     | 1.00     | 0.02 (0.02-0.02)      | 0.08 (0.08-0.09)  |
| 0.75     | 0.50     | 0.21 (0.20-0.22)      | 0.21 (0.20-0.21)  |
| 0.75     | 0.75     | 0.10 (0.09-0.10)      | 0.14 (0.14-0.15)  |
| 0.75     | 1.00     | 0.05 (0.04-0.05)      | 0.11 (0.11-0.11)  |
| 1.00     | 0.50     | 0.84 (0.83-0.85)      | 0.72 (0.71-0.73)  |
| 1.00     | 0.75     | 0.61 (0.60-0.62)      | 0.48 (0.47-0.49)  |
| 1.00     | 1.00     | 0.28 (0.27-0.29)      | 0.26 (0.25-0.26)  |

Table S5. Risk ratio for the overall population of Indiana under alternative scenarios about school operating capacity and face-mask adherence in schools. We define the risk ratio as the ratio of the cumulative number of events (infections or deaths) between August 24 and December 31 under the scenario indicated by the left two columns as compared to a scenario in which schools operate at full capacity and without face masks.

| Capacity | Facemask | Student infections  | Student symptoms    |
|----------|----------|---------------------|---------------------|
| 0.50     | 0.50     | 0.011 (0.011-0.012) | 0.011 (0.010-0.011) |
| 0.50     | 0.75     | 0.008 (0.008-0.008) | 0.008 (0.008-0.008) |
| 0.50     | 1.00     | 0.006 (0.006-0.006) | 0.006 (0.006-0.006) |
| 0.75     | 0.50     | 0.186 (0.176-0.196) | 0.169 (0.161-0.178) |
| 0.75     | 0.75     | 0.072 (0.068-0.077) | 0.065 (0.061-0.070) |
| 0.75     | 1.00     | 0.024 (0.023-0.026) | 0.023 (0.022-0.024) |
| 1.00     | 0.50     | 0.828 (0.823-0.834) | 0.817 (0.811-0.822) |
| 1.00     | 0.75     | 0.587 (0.577-0.599) | 0.562 (0.550-0.573) |
| 1.00     | 1.00     | 0.253 (0.241-0.265) | 0.234 (0.223-0.245) |

Table S6. Risk ratio for students under alternative scenarios about school operating capacity and face-mask adherence in schools. We define the risk ratio as the ratio of the cumulative number of events (infections or symptomatic infections) between August 24 and December 31 under the scenario indicated by the left two columns as compared to a scenario in which schools operate at full capacity and without face masks.

| Capacity | Facemask | Teacher infections  | Teacher symptoms    | Teacher deaths      |
|----------|----------|---------------------|---------------------|---------------------|
| 0.50     | 0.50     | 0.015 (0.014-0.016) | 0.014 (0.013-0.014) | 0.009 (0.008-0.009) |
| 0.50     | 0.75     | 0.012 (0.012-0.013) | 0.011 (0.011-0.012) | 0.008 (0.008-0.008) |
| 0.50     | 1.00     | 0.011 (0.010-0.011) | 0.010 (0.010-0.010) | 0.007 (0.007-0.007) |
| 0.75     | 0.50     | 0.178 (0.170-0.187) | 0.157 (0.149-0.164) | 0.095 (0.090-0.100) |
| 0.75     | 0.75     | 0.077 (0.072-0.082) | 0.067 (0.063-0.071) | 0.043 (0.041-0.045) |
| 0.75     | 1.00     | 0.032 (0.031-0.034) | 0.029 (0.027-0.031) | 0.019 (0.018-0.020) |
| 1.00     | 0.50     | 0.858 (0.852-0.863) | 0.839 (0.832-0.844) | 0.723 (0.711-0.733) |
| 1.00     | 0.75     | 0.637 (0.626-0.648) | 0.598 (0.585-0.610) | 0.447 (0.433-0.461) |
| 1.00     | 1.00     | 0.300 (0.288-0.313) | 0.271 (0.259-0.283) | 0.179 (0.170-0.188) |

Table S7. Risk ratio for teachers under alternative scenarios about school operating capacity and face-mask adherence in schools. We define the risk ratio as the ratio of the cumulative number of events (infections, symptomatic infections, or deaths) between August 24 and December 31 under the scenario indicated by the left two columns as compared to a scenario in which schools operate at full capacity and without face masks.

| Capacity | Facemask | Family infections   | Family symptoms     | Family deaths       |
|----------|----------|---------------------|---------------------|---------------------|
| 0.50     | 0.50     | 0.005 (0.005-0.005) | 0.005 (0.004-0.005) | 0.004 (0.004-0.005) |
| 0.50     | 0.75     | 0.003 (0.003-0.003) | 0.003 (0.003-0.003) | 0.003 (0.003-0.003) |
| 0.50     | 1.00     | 0.002 (0.002-0.002) | 0.002 (0.002-0.002) | 0.003 (0.003-0.003) |
| 0.75     | 0.50     | 0.081 (0.077-0.086) | 0.069 (0.066-0.072) | 0.042 (0.039-0.044) |
| 0.75     | 0.75     | 0.015 (0.014-0.015) | 0.013 (0.013-0.014) | 0.011 (0.011-0.012) |
| 0.75     | 1.00     | 0.004 (0.004-0.004) | 0.004 (0.004-0.004) | 0.004 (0.004-0.005) |
| 1.00     | 0.50     | 0.705 (0.694-0.716) | 0.673 (0.661-0.685) | 0.533 (0.519-0.546) |
| 1.00     | 0.75     | 0.241 (0.232-0.251) | 0.210 (0.201-0.218) | 0.128 (0.122-0.133) |
| 1.00     | 1.00     | 0.015 (0.015-0.016) | 0.014 (0.013-0.015) | 0.012 (0.012-0.013) |

Table S8. Risk ratio for family members of students and teachers under alternative scenarios about school operating capacity and face-mask adherence in schools. We define the risk ratio as the ratio of the cumulative number of events (infections or deaths) between August 24 and December 31 under the scenario indicated by the left two columns as compared to a scenario in which schools operate at full capacity and without face masks.

| Parameter                                  | Value                                   |
|--------------------------------------------|-----------------------------------------|
| Importations scaling factor                | 1.299 (95% CrI: 0.502-1.461)            |
| Susceptibility slope                       | 0.757 (95% CrI: 0.578-3.344)            |
| Susceptibility minimum                     | 0.346 (95% CrI: 0.311-0.506)            |
| Susceptibility inflection point            | 18.640 (95% CrI: 18.521-19.804)         |
| Susceptibility maximum                     | 0.834 (95% CrI: 0.652-0.946)            |
| Shelter in place adherence                 | 0.321 (95% CrI: 0.288-0.669)            |
| Face-mask adherence                        | 0.534 (95% CrI: 0.461-0.540)            |
| LTC importations scaling factor            | 0.037 (95% CrI: 0.022-0.092)            |
| Transmissibility                           | 0.593 (95% CrI: 0.501-0.788)            |
| Probability of symptoms (by age)           | Fig. S4A                                |
| Incubation period                          | Fig. S4B                                |
| Symptomatic period                         | Fig. S4C                                |
| Probability of death (by age)              | Fig. S4D                                |
| Probability of death after symptom onset   | Fig. S4E                                |
| Pre-infectious period                      | meanlog = 23.7, sdlog = 50 (Fig. S4F)   |
| Infectious period                          | meanlog = 33.8, sdlog = 43.1 (Fig. S4F) |
| Adjusted odds ratio for face-mask efficacy | 0.30 [34]                               |
| School contacts                            | 0.6 [30, 36]                            |
| Classroom contacts                         | 1.2 [30, 36]                            |
| Workplace contacts                         | 0.06 [30, 36]                           |
| Office contacts                            | 0.13 [30, 36]                           |
| Household contacts                         | 0.14 [30, 36]                           |
| Neighborhood contacts                      | 0.78 [30, 36]                           |

Table S9. List of model parameters. The first nine were estimated through the model calibration process, and the subsequent fourteen were assumed based on the literature, as described in the Methods. Values of the first nine parameters reflect marginal posterior estimates.



| Group                      | Size      |
|----------------------------|-----------|
| Schools of size 0-100      | 945       |
| Schools of size 100-500    | 703       |
| Schools of size 1000+      | 291       |
| Schools of size 500-1000   | 830       |
| State populalation         | 6,286,795 |
| Students in grades 1 to 12 | 1,094,916 |
| Students in kinder         | 72,210    |
| Students in prek           | 73,695    |
| Students in ungraded       | 57,222    |
| Total 0 - 10               | 903,156   |
| Total 10 - 20              | 907,120   |
| Total 20+                  | 4,476,519 |
| Total living with students | 1,682,904 |
| Total students             | 1,298,043 |

Table S10. Summary of key features of the synthetic population of Indiana.

| Capacity | Facemask | Face-mask adjusted odds ratio |                  |                  |
|----------|----------|-------------------------------|------------------|------------------|
|          |          | 0.12                          | 0.30             | 0.73             |
| 0.50     | 0.50     | 1.3 (1.2-1.3)                 | 1.6 (1.5-1.6)    | 3.7 (3.6-3.9)    |
| 0.50     | 0.75     | 1.1 (1.1-1.2)                 | 1.3 (1.3-1.4)    | 3.4 (3.2-3.5)    |
| 0.50     | 1.00     | 1.1 (1.0-1.1)                 | 1.2 (1.2-1.3)    | 3.1 (2.9-3.2)    |
| 0.75     | 0.50     | 3.3 (3.1-3.4)                 | 10.7 (10.1-11.3) | 24.9 (24.0-25.7) |
| 0.75     | 0.75     | 1.6 (1.5-1.6)                 | 4.9 (4.6-5.3)    | 23.5 (22.7-24.2) |
| 0.75     | 1.00     | 1.2 (1.1-1.2)                 | 2.4 (2.3-2.5)    | 21.9 (21.1-22.7) |
| 1.00     | 0.50     | 29.5 (28.7-30.4)              | 42.8 (41.5-44.3) | 33.5 (32.3-34.7) |
| 1.00     | 0.75     | 5.6 (5.3-5.9)                 | 31.0 (29.8-32.1) | 33.1 (32.0-34.2) |
| 1.00     | 1.00     | 1.5 (1.4-1.5)                 | 14.3 (13.6-15.2) | 32.7 (31.7-33.9) |

Table S11. Proportional increases in cumulative infections statewide during fall 2020 under alternative values of face-mask protection, defined as the odds ratio (columns) and alternative scenarios about school operating capacity and face-mask adherence in schools (rows). These increases are relative to a scenario in which schools operated remotely in fall 2020.

| Capacity | Facemask | Settings related to probability of isolation |                  |                  |
|----------|----------|----------------------------------------------|------------------|------------------|
|          |          | 0.5                                          | 0.68             | 0.9              |
| 0.50     | 0.50     | 1.8 (1.8-1.9)                                | 1.6 (1.5-1.6)    | 1.8 (1.6-2.0)    |
| 0.50     | 0.75     | 1.5 (1.4-1.6)                                | 1.3 (1.3-1.4)    | 1.5 (1.4-1.7)    |
| 0.50     | 1.00     | 1.3 (1.2-1.3)                                | 1.2 (1.2-1.3)    | 1.3 (1.2-1.5)    |
| 0.75     | 0.50     | 13.1 (12.6-13.7)                             | 10.6 (10.1-11.3) | 10.6 (9.6-11.6)  |
| 0.75     | 0.75     | 6.9 (6.5-7.3)                                | 4.9 (4.7-5.2)    | 6.2 (5.6-6.8)    |
| 0.75     | 1.00     | 3.3 (3.1-3.5)                                | 2.4 (2.3-2.5)    | 3.3 (3.0-3.6)    |
| 1.00     | 0.50     | 34.1 (33.1-35.2)                             | 42.9 (41.2-44.4) | 31.3 (29.1-33.7) |
| 1.00     | 0.75     | 26.7 (25.8-27.6)                             | 30.9 (29.8-32.2) | 23.3 (21.5-25.0) |
| 1.00     | 1.00     | 14.4 (13.8-15.1)                             | 14.3 (13.6-15.2) | 12.7 (11.6-13.9) |

Table S12. Proportional increases in cumulative infections statewide during fall 2020 under alternative values of the probability of isolation given symptoms (columns) and alternative scenarios about school operating capacity and face-mask adherence in schools (rows). These increases are relative to a scenario in which schools operated remotely in fall 2020.

| Capacity | Facemask | Settings related to juvenile transmission |                     |                  |                  |
|----------|----------|-------------------------------------------|---------------------|------------------|------------------|
|          |          | Default                                   | Equal Susc.         | Low 0-10 Susc.   | Low Asymp. Inf.  |
| 0.50     | Low      | 1.6 (1.5-1.6)                             | 6.1 (5.8-6.4)       | 1.5 (1.4-1.6)    | 1.7 (1.7-1.8)    |
| 0.50     | Med      | 1.3 (1.3-1.4)                             | 4.2 (4.0-4.4)       | 1.3 (1.3-1.4)    | 1.5 (1.4-1.5)    |
| 0.50     | High     | 1.2 (1.2-1.3)                             | 3.0 (2.9-3.1)       | 1.2 (1.1-1.3)    | 1.3 (1.3-1.4)    |
| 0.75     | Low      | 10.7 (10.0-11.3)                          | 348.0 (335.2-361.7) | 9.3 (8.8-9.8)    | 10.0 (9.5-10.4)  |
| 0.75     | Med      | 4.9 (4.6-5.2)                             | 265.3 (254.7-276.8) | 4.6 (4.4-4.9)    | 5.9 (5.7-6.2)    |
| 0.75     | High     | 2.4 (2.3-2.5)                             | 181.6 (174.0-189.9) | 2.3 (2.2-2.4)    | 3.2 (3.0-3.3)    |
| 1.00     | Low      | 42.9 (41.4-44.5)                          | 687.5 (670.0-706.1) | 26.5 (25.4-27.7) | 26.2 (25.5-26.9) |
| 1.00     | Med      | 31.0 (29.8-32.2)                          | 669.3 (652.3-686.8) | 20.8 (19.9-21.7) | 21.0 (20.3-21.6) |
| 1.00     | High     | 14.3 (13.6-15.1)                          | 641.9 (624.5-659.7) | 11.3 (10.8-11.9) | 13.2 (12.7-13.8) |

Table S13. Proportional increases in cumulative infections statewide during fall 2020 under alternative assumptions about juvenile transmission (columns) and alternative scenarios about school operating capacity and face-mask adherence in schools (rows). These increases are relative to a scenario in which schools operated remotely in fall 2020.

## 2 Supplementary methods

### 3 Model description

#### 4 People and their contacts

5 FRED simulates pathogen spread in a population by recreating interactions among people on  
6 a daily basis. To realistically represent the population of Indiana, we drew on a synthetic  
7 population of the US that represents demographic and geographic characteristics from 2010 [35].  
8 Each human is modeled as an agent that visits a set of places defined by their activity space. This  
9 activity space contains places such as houses, schools, workplaces, and neighborhood locations.  
10 Transmission can occur when an infected person visits the same location as a susceptible person  
11 on the same day, with numbers of contacts per person specific to each location type. For instance,  
12 school contacts depend not on the size of the school but on the age of the student. We adopted  
13 contact rates specific to each location type that were previously calibrated to attack rates for  
14 influenza in each location type [30, 36].

#### 15 Importation to seed local transmission

16 To initialize the model, we simulated international and domestic importations similar to Perkins  
17 et al. [57]. First, we obtained data on internationally and domestically imported deaths in  
18 Indiana up to March 18 [58], which we used to extrapolate total international and domestic im-  
19 portations based on the case fatality risk [38], the proportion of infections that are asymptomatic  
20 [37], and the probability of detecting local and international symptomatic infections [57]. Second,  
21 we assigned times to internationally imported infections proportional to international incidence  
22 patterns, adjusted to account for the timing of a ban on travel from China. We assigned times to  
23 domestically imported infections proportional to total US incidence. Drawing from uncertainty  
24 distributions for each of the three aforementioned parameters, we repeated this process 1,000  
25 times and averaged across replicates. We used that average curve to seed our model, scaling  
26 its magnitude with a parameter that we calibrated. Although importations from outside Indi-  
27 ana likely continued beyond those that we were able to account for explicitly, we assumed that  
28 transmission within Indiana was sufficient at that point to be the primary driver of incidence.  
29 In addition to importations in the overall population, we simulated importation into long-term  
30 care facilities, given the large number of deaths that took place there and the limited realism of  
31 our model in simulating visitors to those facilities. We introduced infections into these facilities  
32 at a constant rate that we calibrated.

#### 33 Transmission and disease progression

34 Once infected, each individual had latent and infectious periods drawn from distributions cal-  
35 ibrated so that the average generation interval distribution matched estimates from Singapore  
36 ( $\mu = 5.20$ ,  $\sigma = 1.72$ ) [33]. The absolute risk of transmission depended on the number and location  
37 of an infected individual's contacts and a parameter that controls SARS-CoV-2 transmissibility  
38 upon contact, which we calibrated. We assumed asymptomatic infections were as infectious as

39 symptomatic infections and had identical timing of infectiousness [39, 40, 26, 41]. Following  
40 exposure, we assumed that children were less susceptible to infection than adults, which we  
41 modeled with a modified logistic function calibrated to results of Davies et al. [19]. We defined  
42 four parameters of this function as the *minimum* susceptibility, the *maximum* susceptibility, the  
43 *inflection point* of susceptibility with respect to age, and the *slope* of the age-susceptibility re-  
44 lationship around the inflection point. For agents that developed symptoms, we took random  
45 draws from lognormal distributions for the incubation period [32] and duration of symptoms  
46 [31]. Both the probabilities of developing symptoms and dying [21] were assumed to increase  
47 with age. The probability of developing symptoms by age was estimated using the age distribu-  
48 tion of cases in the China CDC report from early in the pandemic[38] and the age distribution  
49 of the population in China[79]. By assuming equal exposure by age and assuming that 50% of  
50 infections proceed asymptotically (an intermediate value of two estimates from the Diamond  
51 Princess [37, 80]), we can calculate the proportion of symptomatic infections we would expect  
52 in each age group as under our assumptions, the total number of infections in an age-group will  
53 be proportional to the population size in that age-group. For infections that resulted in death,  
54 we modeled the time to death with a gamma distribution [22] truncated at the 99th percentile.  
55 These and other parameters are summarized in Table S9 and Fig. S4.

## 56 **Changes in agent behavior during the epidemic**

57 Agent behavior in FRED has the potential to change over the course of an epidemic. Following  
58 the onset of symptoms, infected agents self-isolate at home according to a fixed daily rate,  
59 whereas others continue their daily activities [42]. This rate is chosen so that on average 68% of  
60 agents will self-isolate at some point during their symptoms, assuming that all individuals who  
61 develop a fever will isolate at some point during their symptoms, based on published studies in  
62 the U.S. [43]. Agents can also respond to public health interventions, including school closure,  
63 shelter in place, and a combination of mask-wearing and social distancing. School closures  
64 occur on specific dates [81], resulting in students limiting their activity space to household and  
65 neighborhood locations. Shelter-in-place interventions reduce some agents' activity spaces to  
66 their households only, whereas others continue with their daily routines. We used mobility  
67 reports from Google [46] to drive daily compliance with shelter-in-place, such that shelter-in-  
68 place compliance in our model accounts for both the effects of shelter-in-place orders and some  
69 people deciding to continue staying at home after those orders are lifted [47]. To account for  
70 voluntary mask-wearing and social distancing, we used Google Trends data for Indiana using the  
71 terms "face mask" and "social distancing" [48] and used estimates on face-mask adherence from  
72 a New York Times analysis of a survey from Dynata [49].

## 73 **Model calibration**

74 We selected nine parameters to estimate based on calibration of the model to four data types  
75 on COVID-19 in Indiana: daily incidence of death, age distribution of deaths, daily incidence of  
76 hospitalization, and daily test positivity. The initial ranges for the statewide and long-term care  
77 facility importations were adjusted to cover a wide range of values. Compliance with shelter-



78 in-place was informed with changes in mobility patterns in the Google community reports [46].  
 79 We fitted a GAM to the trends from the percentage change on mobility trends for places of  
 80 residence, and projected the compliance of shelter-in-place orders after the period for which we  
 81 had data by assuming a linear trend thereafter. We normalized these mobility trends from 0%  
 82 (baseline) to 100% (everyone at home) and adjusted its magnitude with a parameter representing  
 83 the maximum compliance in the historical trends. The minimum, maximum, inflection point,  
 84 and slope of the logistic function with which we model the age-susceptibility relationship were  
 85 calibrated to estimates by Davies et al. [19].

86 We simulated 6,000 combinations of these nine parameters,  $\vec{\theta}$ , using a sobol design sampling  
 87 algorithm with the `sobolDesign` function in R [51, 52]. For each parameter set, we calculated the  
 88 likelihood of the model given the observed data on daily incidence of death, cumulative deaths  
 89 in long-term care facilities through July 13, the decadal age distribution of cumulative deaths  
 90 through July 13, daily incidence of hospitalization, and test positivity.

91 We calculated the contribution to the likelihood for daily incidence of death and cumulative  
 92 deaths in long-term care facilities using a negative binomial distribution as

$$\mathcal{L}(\vec{\theta}|D_{t,k}) = \text{Negative Binomial}(r, p),$$

93 where  $D_{t,k}$  is the daily incidence of death on day  $t$  and location  $k$  (long-term care facilities or all  
 94 other locations), and  $r$  and  $p$  are size and probability parameters, respectively. We informed  $r$  and  
 95  $p$  using the conjugate prior relationship between a beta prior and negative binomial likelihood,  
 96 such that  $r = r_{prior} + d_{t,m}$  and  $p = 1/(1 + \frac{p_{prior}}{p_{prior}+1})$ , where  $d_{t,m}$  is the daily incidence of death  
 97 predicted by the model on day  $t$ . For the decadal age distribution of cumulative deaths through  
 98 July 13, we used a multinomial distribution, such that

$$\mathcal{L}(\vec{\theta}|D_a) = \text{Multinomial}(D_a, d_{a,m} / \sum_a d_a),$$

99 where  $D_a$  is the observed number of deaths in the age group  $a$ , and  $d_{a,m}$  are the deaths by age  
 100 group obtained by the model. To fit to data on testing, we first observe, using Bayes' rule, that

$$\begin{aligned} P(C|T) &= \frac{P(T|C)P(C)}{P(T|C)P(C) + P(T|\neg C)P(\neg C)} \\ &= \frac{P(C)}{P(C) + r(1 - P(C))}, \end{aligned}$$

101 where  $C$  refers to a symptomatic case,  $T$  refers to an administered PCR test for current in-  
 102 fection, and  $r = P(T|\neg C)/P(T|C)$ . Next, we assume that non-symptomatic infections (either  
 103 presymptomatic or asymptomatic) exhibit treatment-seeking behavior similar to uninfected in-  
 104 dividuals, or  $P(T|I) = P(T|U) = P(T|\neg C)$ , where  $I$  refers to a non-symptomatic infection and  
 105  $U$  to uninfected. We then observe, again using Bayes' rule, that

$$P(I|T) = \frac{rP(I)}{P(C) + r(1 - P(C))}$$

106 and

$$P(U|T) = \frac{rP(U)}{P(C) + r(1 - P(C))}.$$

107 Next, we incorporate PCR sensitivity and specificity by assuming that sensitivity =  $(P|C) =$   
108  $P(P|I)$ , where  $P$  refers to a positive test (i.e., we assume that PCR sensitivity is similar for  
109 non-symptomatic and symptomatic infections). This allows us to write

$$P(P|T) = \text{sensitivity}(P(C|T) + P(I|T)) + (1 - \text{specificity})P(U|T).$$

110 Then, we are in a position to write the contribution to the likelihood from the testing data,  
111 assuming that the number of positive tests in the data,  $T_+$ , follows a binomial distribution

$$\mathcal{L}(\vec{\theta}|T_+, T_-) = \text{Binomial}(T_+ + T_-, P(P|T)),$$

112 where  $T_-$  represents the number of negative tests in the data.

113 Finally, the combined log-likelihood was obtained as

$$\log(\mathcal{L}(\vec{\theta})) = \sum_t \left( \log(\mathcal{L}(\vec{\theta}|D_{t,overall})) \right) + \log(\mathcal{L}(\vec{\theta}|D_{longtermcare})) + \log(\mathcal{L}(\vec{\theta}|T_+, T_-)) + \sum_a \left( \log(\mathcal{L}(\vec{\theta}|D_a)) \right).$$

114 We sampled the parameters proportional to their likelihood to obtain a set of parameter combi-  
115 nations that constitute our approximation of the posterior distribution of parameter values.
